1  
2  
3  
4  
5  
6  
7  
8  
9  
10  
11  
12  
13  
14  
15  
16  
17  
18  
19  
20  
21  
22  
23  
24  
25  
26  
27  
28  
29

**CB1 receptor signaling modulates amygdalar plasticity during context-cocaine memory reconsolidation to promote subsequent cocaine seeking**

**Running title: Amygdala CB1 receptor signaling and cocaine-memory reconsolidation**

Jessica A. Higginbotham<sup>1</sup>, Rong Wang<sup>1</sup>, Ben D. Richardson<sup>1,2,3</sup>, Hiroko Shiina<sup>1</sup>, Shi Min Tan<sup>1</sup>, Mark A. Presker<sup>4</sup>, David J. Rossi<sup>1,5</sup>, Rita A. Fuchs<sup>1,5,6\*</sup>

<sup>1</sup>Department of Integrative Physiology and Neuroscience, Washington State University College of Veterinary Medicine, Pullman, WA, USA  
<sup>2</sup>Department of Biological Engineering, University of Idaho, Moscow, ID, USA  
<sup>3</sup>WWAMI Medical Education, University of Idaho, Moscow, ID, USA  
<sup>4</sup>Department of Psychology and Neuroscience, University of North Carolina, Chapel Hill, NC, USA  
<sup>5</sup>Washington State University Alcohol and Drug Abuse Research Program, Pullman, WA, USA  
<sup>6</sup>Translational Addiction Research Center, Washington State University, Pullman, WA, USA

\*Corresponding author: Dr. Rita A. Fuchs, [rita.fuchs@wsu.edu](mailto:rita.fuchs@wsu.edu)

**Conflict of Interest:** The authors have no conflicts of interest to disclose.

**Acknowledgements:** This research was funded by NIDA R01 DA025646 (RAF), NIDA F31 DA 045430 (JAH), NIAAA R01 AA026078 (DJR), NINDS T32 NS007431 (MAP), and Washington State Initiative 171 (JAH) and 502 (RAF) funds administered through the Washington State University Alcohol and Drug Abuse Research Program.

30 **ABSTRACT**

31 Contextual drug-associated memories precipitate craving and relapse in cocaine users. Such  
32 associative memories can be weakened through interference with memory reconsolidation, a  
33 process by which memories are maintained following memory retrieval-induced destabilization.  
34 We hypothesized that cocaine-memory reconsolidation requires cannabinoid type 1 receptor  
35 (**CB1R**) signaling based on the fundamental role of the endocannabinoid system in synaptic  
36 plasticity and emotional memory processing. Using an instrumental rat model of cocaine relapse,  
37 we evaluated whether systemic CB1R antagonism (**AM251**; 3 mg/kg, I.P.) during memory  
38 reconsolidation alters (a) subsequent drug context-induced cocaine-seeking behavior, as well as  
39 (b) cellular adaptations and (c) excitatory synaptic physiology in the basolateral amygdala (**BLA**).  
40 Systemic CB1R antagonism – during, but not after, cocaine-memory reconsolidation – reduced  
41 drug context-induced cocaine-seeking behavior three days, but not three weeks, later. CB1R  
42 antagonism also inhibited memory retrieval-associated increases in BLA zinc finger 268 (**zif268**)  
43 and activity regulated cytoskeletal-associated protein (**Arc**) immediate-early gene expression and  
44 changes in BLA  $\alpha$ -amino-3-hydroxy-5-methyl-4-isoxazolepropionic acid receptor (**AMPA**) and  
45 N-methyl-D-aspartate receptor (**NMDAR**) subunit phosphorylation that likely contribute to  
46 increased receptor membrane trafficking and synaptic plasticity during memory reconsolidation.  
47 Furthermore, CB1R antagonism increased memory reconsolidation-associated spontaneous  
48 excitatory post-synaptic current frequency in BLA principal neurons during memory  
49 reconsolidation. Together, these findings suggest that CB1R signaling modulates cellular and  
50 synaptic mechanisms in the BLA during cocaine-memory reconsolidation, thereby facilitating  
51 cocaine-memory maintenance. These findings identify the CB1R as a potential therapeutic target  
52 for relapse prevention.

53 **SIGNIFICANCE STATEMENT**

54 Drug relapse can be triggered by the retrieval of context-drug memories upon re-exposure to a  
55 drug-associated environment. Context-drug associative memories become destabilized upon  
56 retrieval and must be reconsolidated into long-term memory stores in order to persist. Hence,  
57 targeted interference with memory reconsolidation can weaken maladaptive context-drug  
58 memories and reduce the propensity for drug relapse. Our findings indicate that cannabinoid type  
59 1 receptor (**CB1R**) signaling is critical for context-cocaine memory reconsolidation and  
60 subsequent drug context-induced reinstatement of cocaine-seeking behavior. Furthermore,  
61 cocaine-memory reconsolidation is associated with CB1R-dependent immediate-early gene  
62 expression and changes in excitatory synaptic proteins and physiology in the basolateral  
63 amygdala. Together, our findings provide initial support for CB1R as a potential therapeutic target  
64 for relapse prevention.

## 65 INTRODUCTION

66 Exposure to drug-associated environmental stimuli triggers the retrieval of maladaptive  
67 drug memories that can precipitate drug craving and relapse in cocaine users (Childress et al.,  
68 1988, 1999; Crombag et al., 2008). Similar to other associative memories, cocaine-associated  
69 memories become labile upon retrieval (Nader et al., 2000). Retention of these memories requires  
70 memory reconsolidation processes that involve *de novo* protein synthesis (Nader et al., 2000;  
71 Fuchs et al., 2009; Wells et al., 2011a) and glutamatergic synaptic plasticity (Rao-Ruiz et al.,  
72 2015; Rich and Torregrossa, 2018). Consequently, targeted interference with memory  
73 reconsolidation can weaken contextual cocaine-associated memories and reduce the propensity  
74 for drug relapse (Fuchs et al., 2009; Ramirez et al., 2009; Wells et al., 2011, 2013, 2016; Arguello  
75 et al., 2014; Stringfield et al., 2017). Accordingly, it is important to investigate the cellular  
76 mechanisms of cocaine-memory reconsolidation with a focus on viable therapeutic targets.

77 Endocannabinoids are retrograde messengers that modulate excitatory and inhibitory  
78 synaptic plasticity (Castillo et al., 2012) and some forms of memory reconsolidation through the  
79 stimulation of presynaptic cannabinoid type 1 receptors (**CB1Rs**) (see Stern et al., 2018 for  
80 review). CB1R antagonism during memory reconsolidation impairs Pavlovian morphine- (De  
81 Carvalho et al., 2014), methamphetamine- (Yu et al., 2009), and nicotine- (Fang et al., 2011)  
82 conditioned place preference (**CPP**) memories. However, critical gaps remain in our  
83 understanding of CB1R involvement in memory reconsolidation. First, it is unclear whether CB1Rs  
84 regulate the reconsolidation of *cocaine* memories. Second, it is not known whether CB1Rs play  
85 similar roles in the reconsolidation of drug memories forged in instrumental versus Pavlovian  
86 paradigms, as extant literature indicates that Pavlovian and instrumental cocaine-associated  
87 memories are reconsolidated through partially distinct neural mechanisms (Miller and Marshall,  
88 2005; Theberge et al., 2010; Wells et al., 2013). Finally, the cellular and synaptic physiological  
89 mechanisms by which CB1Rs modulate drug-memory reconsolidation have not been explored.

90 In the present study, we tested the hypothesis that CB1Rs are critically involved in  
91 contextual cocaine-memory reconsolidation in an instrumental model of drug relapse. First, we  
92 evaluated whether systemic CB1R antagonism during memory reconsolidation impairs cocaine-  
93 memory integrity as indicated by a subsequent, memory retrieval-dependent reduction in cocaine-  
94 seeking behavior. Second, we assessed the effects of memory reconsolidation and systemic  
95 CB1R antagonism on molecular adaptations and excitatory synaptic physiology in the basolateral  
96 amygdala (**BLA**), the critical site for protein synthesis-dependent memory reconsolidation in our  
97 model (Fuchs et al., 2009; Wells et al., 2011b). It has been established that auditory fear-memory  
98 reconsolidation requires memory retrieval-dependent, transient, NMDAR-dependent synaptic  
99 exchange of calcium-impermeable (**CI**, GluA2-containing) AMPARs with calcium-permeable (**CP**,  
100 GluA2-lacking) AMPARs in the lateral amygdala (Clem and Hugarir, 2010; Hong et al., 2013;  
101 Lopez et al., 2015; Yu et al., 2016). While similar research has not explored the molecular  
102 mechanisms of contextual appetitive or aversive memory reconsolidation, we have shown that  
103 BLA protein kinase A (**PKA**) activation is necessary for cocaine-memory reconsolidation in the  
104 drug context-induced reinstatement model (Arguello et al., 2014). Other studies have  
105 demonstrated that PKA-mediated GluA1<sup>S845</sup> phosphorylation enhances GluA1 synaptic  
106 recruitment (Clem and Hugarir, 2010), whereas Src-family tyrosine kinase (**Src**)-mediated  
107 GluA2<sup>Y876</sup> phosphorylation elicits GluA2 endocytosis (Hayashi and Hugarir, 2004). Thus, elevated  
108 Ca<sup>2+</sup> influx through NMDARs activates PKA and Src tyrosine kinases which promote changes in  
109 synaptic AMPAR-subunit composition that collectively mediate expression of long-term  
110 potentiation (**LTP**; He et al., 2009; Makino and Malinow, 2009). Moreover, Src-mediated  
111 GluN2B<sup>Y1472</sup> phosphorylation is required for proper GluN2B synaptic localization, signaling, and  
112 amygdalar synaptic plasticity, raising another kinase control point for plasticity expression and/or  
113 initiation (Nakazawa et al., 2006). Accordingly, in the present study, we identified alterations in  
114 immediate-early gene (**IEGs**) expression and in glutamate receptor subunit expression and  
115 phosphorylation with a focus on GluA1<sup>S845</sup>, GluA2<sup>Y876</sup>, and GluN2B<sup>Y1472</sup> phosphorylation. In an

116 attempt to explore the synaptic physiological significance of these post-translational protein  
117 modifications, we determined changes in excitatory postsynaptic currents (**EPSCs**) in  
118 glutamatergic pyramidal principal neurons (**PNs**) of the BLA.

119

## 120 **MATERIALS AND METHODS**

### 121 ***Animals***

122 Male Sprague-Dawley rats ( $n = 108$ ; 275-300 g at the start of the experiment) were  
123 individually housed in a temperature- and humidity-controlled vivarium on a reversed light/dark  
124 cycle (lights on at 6:00 am). Rats were given *ad libitum* access to water and 20-25 g of standard  
125 rat chow per day. The housing and care of animals were conducted in accordance with guidelines  
126 defined in the *Guide for the Care and Use of Laboratory Animals* (National Research Council,  
127 2011) and approved by the Washington State University Institutional Animal Care and Use  
128 Committee.

129

### 130 ***Food Training and Surgery***

131 To facilitate the acquisition of drug self-administration, rats were trained to press a lever  
132 (active lever) under a continuous food reinforcement schedule in standard operant conditioning  
133 chambers (Coulbourn Instruments, Holliston, MA) during a 16-h overnight food training session.  
134 Each active-lever response resulted in the unsignaled delivery of one food pellet (45 mg pellets;  
135 Bioserv, Flemington, NJ) under a continuous reinforcement schedule. Responses on a second  
136 (inactive) lever were recorded but had no programmed consequences. Contextual stimuli used  
137 for subsequent cocaine conditioning were not present during the food-training session.

138 For jugular catheter implantation, rats were fully anesthetized using ketamine  
139 hydrochloride and xylazine (100 mg/kg and 5 mg/kg, i.p., respectively; Dechara Veterinary  
140 Products, Overland Park, KS and Akorn, Lake Forest, IL) at least 24 h after food training. Jugular

141 catheters were constructed in house and surgically implanted into the right jugular vein to facilitate  
142 cocaine self-administration. The catheters were maintained and periodically tested for patency as  
143 described previously (Fuchs et al., 2007). Rats received the non-steroidal anti-inflammatory  
144 analgesic, carprofen (5 g/kg per d, p.o.; ClearH2O, Westbrook, ME), from 24 h before until 48 h  
145 after surgery.

146

### 147 ***Cocaine Self-Administration and Extinction Training***

148 Rats were randomly assigned to one of two different environmental contexts for cocaine  
149 self-administration training. The two environmental contexts contained distinct olfactory, auditory,  
150 visual, and tactile stimuli, as previously described (Fuchs et al., 2007). Daily 2-h training sessions  
151 were conducted in one of the two environmental contexts during the rats' dark cycle. During  
152 training sessions, active-lever responses were reinforced under a fixed ratio 1 cocaine  
153 reinforcement schedule (0.15 mg cocaine hydrochloride/0.05 mL infusion, i.v.; National Institute  
154 on Drug Abuse Drug Supply Program, Research Triangle Park, NC). Cocaine infusions were  
155 delivered over 2.25 s followed by a 20-s time-out period, during which active-lever responses had  
156 no programmed consequences. Inactive-lever responses had no programmed consequences.  
157 Training continued until the rats reached the acquisition criterion (i.e.,  $\geq 10$  cocaine infusions  
158 obtained per session on at least 10 training days). Next, rats received daily 2-h extinction training  
159 sessions in the alternate environmental context, where lever presses had no programmed  
160 consequences. The number of extinction sessions was set at seven to hold memory age constant  
161 at the time of the experimental manipulation. Immediately after extinction session 4, the rats  
162 received an i.p. injection of saline (1 mL/kg) to acclimate them to the injection procedure.

163

164

165

166 **Experiment 1: Effects of CB1R antagonism immediately after memory retrieval on drug**  
167 **context-induced cocaine seeking three days later**

168 Twenty-four h after the seventh extinction session, rats were re-exposed to the cocaine-  
169 paired context for 15 min to trigger memory retrieval and reconsolidation (**Fig. 1A**). During the  
170 session, lever presses had no programmed consequences. Cocaine reinforcement was withheld  
171 to prevent acute cocaine effects on neurotransmission and endocannabinoid mobilization  
172 independent of memory destabilization (Ortinski et al., 2012; Wang et al., 2015). Immediately after  
173 the session (i.e., during the putative time of memory reconsolidation), rats received systemic  
174 administration of the CB1R antagonist/inverse agonist, *N*- (Piperidin-1-yl)-5- (4-iodophenyl)-1-  
175 (2,4-dichlorophenyl)-4-methyl-1*H*-pyrazole-3-carboxamide (**AM251**, 3 mg/kg; Sigma Aldrich, St.  
176 Louis, MO), or vehicle (**VEH**; 8% DMSO, 5% Tween80 in saline; 1 mL/kg). AM251 at this dose is  
177 sufficient to impair contextual fear learning and memory consolidation (Arenos et al., 2006). On  
178 the next day, daily 2-h extinction training sessions resumed in the designated extinction context  
179 until the rats reached the extinction criterion (i.e.,  $\leq 25$  active-lever presses per session on two  
180 consecutive days; mean number of days to criterion =  $2.0 \pm 0.0$  d). Lever responses in the  
181 extinction context were assessed to detect possible off-target effects of experimental  
182 manipulations on extinction memories. Twenty-four h after the last extinction session, cocaine-  
183 seeking behavior (i.e., non-reinforced lever responses) was assessed in the cocaine-paired  
184 context. Rats were euthanized immediately after the 2-h test session, and their brains were flash  
185 frozen in isopentane and stored for analysis of BLA IEG and glutamate-receptor subunit  
186 expression using western blotting, as described below. Based on the phosphorylation kinetics of  
187 glutamate receptor subunits (Clem and Huganir, 2010; Rao-Ruiz et al., 2011), these tissue  
188 samples were prepared and analyzed for total-protein levels only.

189

190



191 ***Experiment 2: Effects of CB1R antagonism six hours after memory retrieval on drug***  
192 ***context-induced cocaine seeking three days later***

193 Memory reconsolidation impairments require manipulation while the memories are labile  
194 (i.e., 2-4 h after memory retrieval; Tronson and Taylor, 2007). Experiment 2 evaluated whether  
195 any impairments in cocaine-seeking behavior in Experiment 1 reflected a memory reconsolidation  
196 deficit (**Fig. 2A**) as opposed to prolonged impairment in the expression of cocaine-seeking  
197 behavior. The procedures in Experiment 2 were identical to those in Experiment 1 except that rats  
198 received AM251 (3 mg/kg, i.p.) or VEH *six h* after the 15-min memory retrieval session in the  
199 cocaine-paired context, outside of the putative time window of memory reconsolidation. As in  
200 Experiment 1, daily 2-h extinction training sessions resumed in the extinction context after the  
201 memory retrieval session until the extinction criterion was reached (mean number of days to  
202 criterion =  $2.00 \pm 0.0$  d). The extinction sessions were followed by a single 2-h test of cocaine-  
203 seeking behavior in the cocaine-paired context. Rats were euthanized immediately after the test  
204 session. Their brains were flash frozen in isopentane and stored for analysis of BLA IEG and  
205 glutamate receptor subunit expression using western blotting, as in Experiment 1.

206

207 ***Experiment 3: Effects of CB1R antagonism immediately after memory retrieval on drug***  
208 ***context-induced cocaine seeking 24 days later***

209 Experiment 3 assessed whether any effects of AM251 on memory integrity persisted over  
210 time. The procedures were identical to those in Experiment 1 except that, after memory retrieval  
211 and pharmacological manipulation, rats remained in their home cages for 21 days (**Fig. 3A**). Daily  
212 2-h extinction training sessions then resumed until the extinction criterion was reached (mean  
213 number of days to criterion =  $2.93 \pm 0.27$  d), and this was followed by a 2-h test of cocaine-seeking  
214 behavior (i.e., 24 d post treatment). Rats were euthanized immediately after the test session.  
215 Their brains were flash frozen in isopentane and stored for analysis of BLA IEG and glutamate-  
216 receptor subunit expression using western blotting, as in Experiment 1.

217 **Experiment 4: Effects of memory reconsolidation and CB1R antagonism on BLA protein**  
218 **expression and phosphorylation**

219 Experiment 4 evaluated memory reconsolidation-related changes in immediate-early gene  
220 expression and glutamate-receptor subunit expression and phosphorylation. The procedures in  
221 Experiment 4 were identical to those in Experiment 1 except that rats were euthanized 45 min  
222 after memory retrieval or no-memory retrieval (home-cage stay) and pharmacological treatment  
223 (**Fig. 4A**). This euthanasia time point was selected based on the activation kinetics of Arc and  
224 zif268 (Lee, 2004; Li et al., 2005) and associated changes in glutamate-receptor expression and  
225 phosphorylation in other models of synaptic plasticity (Clem and Huganir, 2010; Rao-Ruiz et al.,  
226 2011). The brains were flash frozen in isopentane and stored for analysis of BLA IEG and  
227 glutamate-receptor subunit expression and glutamate-receptor subunit phosphorylation using  
228 western blotting.

229

230 **Western Blotting**

231 Brains were stored at -80 °C before the collection of BLA tissue punches (o.d. 0.75 mm).  
232 Punched tissue was stored at -80 °C in lysis buffer containing 10 mM HEPES, 1% SDS, and 1x  
233 protease and phosphatase inhibitor cocktails (Sigma Aldrich, St. Louis, MO). Samples were  
234 thawed, manually homogenized, and total tissue homogenate protein concentrations were  
235 determined using the Biorad detergent-compatible protein assay ( $R^2 \geq 0.99$ ). After electrophoresis  
236 and transfer, membranes were dried overnight at 4°C. The next day, membranes were reactivated  
237 in methanol and blocked before incubation overnight in Odyssey blocking buffer (Li-Cor  
238 Biosciences, Lincoln, NE) with 0.2% Tween 20 and primary antibodies targeting Arc (Cat# sc-  
239 17839, RRID:AB\_626696), zif268 (Cat# sc-189, RRID: AB\_2231020), NMDAR subunit 2B  
240 (**GluN2B**; Cat# 06-600, RRID:AB\_310193), phospho-Tyr<sup>1472</sup>-GluN2B (**pGluN2B**; Cat# p1516-  
241 1472, RRID:AB\_2492182), GluA1 (Cat# sc-13152, RRID:AB\_627932), phospho-Ser<sup>845</sup>-GluA1

242 (pGluA1; Cat# AB5849, RRID:AB\_92079), GluA2 (Cat# MABN1189, RRID:AB\_2737079),  
243 phospho-Tyr<sup>876</sup>-GluA2 (pGluA2; Cat# 4027, RRID:AB\_1147622), calnexin (CNX; Cat# ADI-SPA-  
244 860, RRID:AB\_10616095), or glyceraldehyde-3-phosphate dehydrogenase (GAPDH; Cat#  
245 ab8245, RRID:AB\_2107448). Membranes were then washed and incubated for 1 h in Odyssey  
246 blocking buffer with 0.2% Tween 20 and 0.01% SDS with the following near-infrared fluorescent  
247 secondary antibodies: IRDye® 800CW goat anti-mouse (Cat# 926-32210, RRID:AB\_621842),  
248 IRDye® 800CW goat anti-rabbit (Cat# 926-32211, RRID:AB\_621843), IRDye® 680RD donkey  
249 anti-mouse (Cat# 926-68072, RRID:AB\_10953628), and IRDye® 680LT goat anti-rabbit (Cat#  
250 926-68021, RRID:AB\_10706309). For multiplexed targets (based on antibody availability), the  
251 800-nm channel was used to detect the lowest-abundance, phospho-proteins as it provides lower  
252 background, maximizing detection sensitivity (Schutz-Geschwender et al., 2004). Total proteins  
253 were detected in the 680-nm channel. Membranes were digitally imaged using a Li-Cor Odyssey  
254 CLX. Integrated optical intensity values for target protein bands were derived using Li-Cor Image  
255 Studio Software (RRID: SCR\_015795). Total protein levels were normalized to a loading control  
256 and expressed as a percentage of the comparator group (Experiments 1-3: VEH-treated;  
257 Experiment 4: VEH-no-memory retrieval). Phospho-specific values were normalized to total  
258 protein values. A lane-normalization factor was calculated for the total and house-keeping  
259 proteins by dividing the lane's integrated optical intensity value by the highest signal value on the  
260 blot. Target-protein integrated intensity values were divided by the respective loading control's  
261 lane-normalization factor to normalize signal values across blots (Schutz-Geschwender et al.,  
262 2004).

263

264 ***Experiment 5: Effects of post-retrieval CB1R antagonism on excitatory synaptic***  
265 ***transmission in BLA PNs at memory reconsolidation***

266 Experiment 5 examined the effects of memory reconsolidation and systemic CB1R  
267 antagonism on glutamatergic EPSCs in BLA PNs, the primary output neurons of the BLA

268 (McDonald, 1984). The procedures in Experiment 5 were identical to those in Experiment 1 except  
269 that rats were exposed to the cocaine-paired context for 15 min (memory retrieval) or remained  
270 in their home cages (no-memory retrieval) before systemic AM251 (3 mg/kg, i.p.) or VEH  
271 administration (**Fig. 6A**). Rats were euthanized and brain slices were prepared for whole-cell  
272 electrophysiology recordings within an average of 30 min of treatment.

273

### 274 ***BLA Brain Slice Electrophysiology***

275 All rats used for electrophysiological recordings were deeply anesthetized with isoflurane  
276 (3-5%). Rats were transcardially perfused with ice-cold artificial cerebrospinal fluid (**aCSF**), which  
277 contained 124 mM NaCl, 26 mM NaHCO<sub>3</sub>, 2.5 mM KCl, 2.5 mM CaCl<sub>2</sub>, 2 mM MgCl<sub>2</sub>, 1 mM  
278 NaH<sub>2</sub>PO<sub>4</sub>, 10 mM D-glucose, and 1 mM kynurenic acid, and was bubbled with 95% O<sub>2</sub>/5% CO<sub>2</sub>  
279 (pH 7.4). After perfusion, the brain was rapidly removed and sliced coronally (225 μm) in ice-cold  
280 dissection buffer that contained 220 mM sucrose, 26 mM NaHCO<sub>3</sub>, 2 mM KCl, 0.5 mM CaCl<sub>2</sub>, 5  
281 mM MgCl<sub>2</sub>, 1.25 mM NaH<sub>2</sub>PO<sub>4</sub>, 2 mM Na-pyruvate, 1 mM ascorbic acid, 10 mM D-glucose, 1 mM  
282 kynurenic acid, and was bubbled with 95% O<sub>2</sub>/5% CO<sub>2</sub>. Tissue slices containing the BLA were  
283 incubated in aCSF (with 1 mM kynurenic acid) at 35-37 °C, after which they were incubated in  
284 room temperature aCSF (with 1 mM kynurenic acid) until used. Slices were discarded within 4 h  
285 of slice preparation.

286 Slices were transferred to a recording chamber and continually perfused (~5 mL/min) in  
287 aCSF (without kynurenic acid) at a bath temperature of 32-35 °C. All pharmacological agents  
288 were dissolved in aCSF and were applied via bath perfusion. BLA pyramidal PNs were visually  
289 identified using differential interference contrast imaging through an Olympus 60x (0.9 NA) water-  
290 immersion objective. Whole-cell patch-clamp recordings were made using glass pipettes with a  
291 resistance of 2-3 MΩ when filled with internal solution that contained 130 mM CsCl, 4 mM NaCl,  
292 0.5 mM CaCl<sub>2</sub>, 10 mM HEPES, 5 mM EGTA, 4 mM Mg-ATP, 0.5 mM Na<sub>2</sub>-GTP, 5 mM QX-314,

293 0.1 mM spermine, and 0.03 mM Alexa568 hydrazide dye with pH adjusted to 7.2–7.3 with CsOH.  
294 Cells were voltage-clamped at -60 or +30 mV. Signals were digitized at 20 kHz, low-pass filtered  
295 at 10 kHz, and additionally filtered at 2 kHz for presentation. To evoke EPSCs (**eEPSCs**), a  
296 concentric bipolar stimulating electrode was placed into the internal capsule (**IC**), and tissue was  
297 stimulated by current pulses (20-50  $\mu$ A, 0.1-ms duration at a frequency of 0.1 Hz). Glutamatergic  
298 responses were pharmacologically isolated using 1  $\mu$ M strychnine and 10  $\mu$ M gabazine to block  
299 glycine and GABA<sub>A</sub> receptors, respectively. AMPAR-mediated synaptic currents were isolated by  
300 adding 50  $\mu$ M D-2-amino-5-phosphonovalerate (**AP5**), a broad-spectrum NMDAR antagonist. Ten  
301 eEPSCs were averaged in each condition, and their mean amplitudes were analyzed with pClamp  
302 software (RRID: SCR\_011323). In the absence of AP5, NMDAR-mediated eEPSCs were  
303 measured as the average amplitude of the EPSC 50 ms after the onset of the stimulus ( $V_h = +30$   
304 mV), when AMPAR-mediated contributions are negligible (**Fig. 6B**). AMPA/NMDA ratios were  
305 calculated as the average inward peak current amplitude ( $V_h = -60$  mV) divided by the outward  
306 current ( $V_h = +30$  mV) amplitude at 50 ms after the onset of the stimulus. The rectification index  
307 was calculated as the average peak eEPSC amplitude at -60 mV divided by the average peak  
308 eEPSC amplitude at +30 mV, both recorded in the presence of AP5 to pharmacologically isolate  
309 the AMPAR component of the eEPSC. Spontaneous EPSCs (**sEPSCs**) from at least 300s long  
310 whole-cell recordings in each condition were analyzed with MiniAnalysis Program software.  
311 sEPSCs were detected automatically with an amplitude detection threshold of 2.5x the amplitude  
312 of the peak to peak of the noise. Events were visually confirmed as previously described  
313 (Richardson and Rossi, 2017), and the frequency and mean peak amplitude at -60 mV and +30  
314 mV was measured.

315

### 316 ***Experimental Design and Statistical Analysis***

317 To identify potential pre-existing group differences in behavioral and drug history, active-  
318 and inactive-lever presses and cocaine intake during drug self-administration training (last 3

319 sessions) and non-reinforced lever presses during extinction training (first 7 extinction sessions)  
320 and during the memory-retrieval session were analyzed using separate mixed-factorial or  
321 univariate ANOVAs with subsequent treatment group as the between-subjects factor and time  
322 (session) as the within-subject factor, or between-subjects t-tests, where appropriate. Non-  
323 reinforced lever presses during the first post-treatment exposure to the extinction context and to  
324 the cocaine context were analyzed using mixed-factorial ANOVAs with memory retrieval (retrieval,  
325 no-memory retrieval) and treatment (AM251, VEH) as between-subjects factors and context  
326 (extinction, cocaine-paired) and time (20-min interval) as within-subjects factors, where  
327 appropriate. For Experiment 1-3, normalized total protein levels at test were analyzed using t-  
328 tests. For Experiments 4-5, phospho-protein levels, total protein levels, peak and mean eEPSC  
329 amplitudes, and sEPSC frequency at memory reconsolidation were analyzed using separate  
330 ANOVAs with treatment and memory retrieval as between-subjects factors. Significant  
331 interactions and main effects were further analyzed using Sidak's or Tukey's *post hoc* tests.  
332 Cumulative probability distributions of sEPSC amplitudes and inter-event intervals across groups  
333 (memory retrieval or no-memory retrieval, with AM251 or VEH) were analyzed using non-  
334 parametric Kruskal-Wallis tests with Dunn's *post hoc* tests. The relationships between active-lever  
335 presses and total protein levels at test were analyzed using Pearson's *r* correlational coefficients.  
336 Alpha was set at 0.05 for all analyses.

337

## 338 **RESULTS**

### 339 ***Behavioral and Drug History***

340 There were no statistically significant differences between the groups in cocaine intake  
341 during drug self-administration training or in lever responding during drug self-administration  
342 training, extinction training, or memory retrieval in Experiments 1-5 (**Fig. 1-3; Extended Fig. 1-1,**  
343 **2-1, 3-1, 6-1; Extended Tables 1-1, 2-1, 3-1, 4-1, 6-1**).

344

345           **Experiment 1: Systemic CB1R antagonism during memory reconsolidation**  
346 **attenuates subsequent drug context-induced cocaine seeking**

347           Systemic AM251 administration immediately after the 15-min cocaine-memory retrieval  
348 session (i.e., at the onset of memory reconsolidation) attenuated cocaine-seeking behavior at test  
349 in a context-dependent manner (**Fig. 1C**; 2 x 2 ANOVA context x treatment interaction,  $F_{(1,13)} =$   
350 10.93,  $p = 0.006$ ; context main effect,  $F_{(1,13)} = 111.80$ ,  $p = 0.0001$ ; treatment main effect,  $F_{(1,13)} =$   
351 8.95,  $p = 0.01$ ). Active-lever responding in the cocaine-paired context was greater than in the  
352 extinction context (Sidak's test,  $p = 0.05$ ). Furthermore, AM251 administered immediately after  
353 memory retrieval attenuated active-lever responding in the cocaine-paired (Sidak's test,  $p = 0.05$ ),  
354 but not the extinction, context relative to VEH. Time-course analysis of active-lever presses in the  
355 cocaine-paired context revealed that responding declined over time, and AM251 reduced  
356 responding during the first 20-min interval relative to VEH (**Fig. 1D**; 2 x 6 ANOVA treatment x time  
357 interaction,  $F_{(5,65)} = 4.11$ ,  $p = 0.003$ , Tukey's tests,  $p < 0.05$ ; time main effect,  $F_{(5,65)} = 14.59$ ,  $p =$   
358 0.0001; treatment main effect  $F_{(1,13)} = 11.86$ ,  $p = 0.004$ ). Inactive-lever responding remained low  
359 in both contexts independent of treatment (**Fig. 1-1**).

360

361 **Experiment 2: Systemic CB1R antagonism outside of the memory reconsolidation window**  
362 **does not alter subsequent drug context-induced cocaine seeking**

363           Systemic AM251 administration 6 h after cocaine-memory retrieval (i.e., after  
364 reconsolidation into long-term memory stores) did not alter subsequent cocaine-seeking behavior  
365 relative to VEH (**Fig. 2C**). Active-lever responding in the cocaine-paired context was higher than  
366 in the extinction context regardless of treatment (2 x 2 ANOVA context main effect,  $F_{(1,15)} = 89.43$ ,  
367  $p < 0.0001$ ), and delayed AM251 administration did not alter responding in either context relative  
368 to VEH (ANOVA treatment main and interaction effects,  $F_{(1,15)} \leq 0.21$ ,  $p \geq 0.65$ ). The time-course  
369 analysis of active-lever presses in the cocaine-paired context indicated that responding declined  
370 after the first 20-min interval independent of treatment (**Fig. 2D**; 2 x 6 ANOVA time main effect,

371  $F_{(5,75)} = 20.45$ ,  $p < 0.0001$ , interval 1 > intervals 2-6, Tukey's tests,  $p < 0.05$ ; treatment main and  
372 interaction effects,  $F_{s(5,75)} \leq 0.88$ ,  $p \geq 0.50$ ). Inactive-lever responding remained low in both  
373 contexts independent of treatment (**Fig. 2-1**).

374

375 ***Experiment 3: Systemic CB1R antagonism during memory reconsolidation fails to alter***  
376 ***drug context-induced cocaine seeking 24 days later***

377 Systemic AM251 administration immediately after cocaine-memory retrieval (i.e., at the  
378 onset of memory reconsolidation) failed to alter cocaine-seeking behavior after a 21-d drug-free  
379 period followed by at least two extinction sessions later, relative to VEH (**Fig. 3C**). Active-lever  
380 responding in the cocaine-paired context was higher than in the extinction context regardless of  
381 treatment (2 x 2 ANOVA context main effect,  $F_{(1,15)} = 48.56$ ,  $p < 0.0001$ ; treatment main and  
382 interaction effects,  $F_{s(1,15)} \leq 3.32$ ,  $p \geq 0.09$ ). Time-course analysis of active-lever presses in the  
383 cocaine-paired context indicated that responding declined after the first 20-min interval  
384 independent of treatment (**Fig. 3D**; 2 x 6 ANOVA time main effect,  $F_{(5,75)} = 20.08$ ,  $p < 0.0001$ ,  
385 interval 1 > intervals 2-6, Tukey's tests,  $p < 0.05$ ; treatment main and interaction effects,  $F_{s(5,75)}$   
386  $\leq 0.57$ ,  $p \geq 0.46$ ). Inactive-lever responding remained low in both contexts independent of  
387 treatment (**Fig. 3-1**).

388

389 ***Experiment 4: Systemic CB1R antagonism inhibits memory retrieval-induced molecular***  
390 ***changes in the BLA during memory reconsolidation***

391 In brain tissue collected during memory reconsolidation (**Fig. 4A-B**), BLA IEG expression  
392 varied as a function of memory retrieval and AM251 treatment. Memory retrieval increased zif268  
393 expression relative to no-memory retrieval (i.e., home cage stay; **Fig. 4C**; 2 x 2 ANOVA, retrieval  
394 x treatment interaction,  $F_{(1,38)} = 18.91$ ,  $p < 0.0001$ ; retrieval main effect,  $F_{(1,38)} = 9.16$ ,  $p = 0.004$ ;  
395 treatment main effect,  $F_{(1,38)} = 9.08$ ,  $p = 0.005$ ). Systemic AM251 administration after memory  
396 retrieval reduced zif268 expression relative to VEH (Sidak's test,  $p < 0.05$ ), such that zif268



397 expression no longer differed from those in the no-memory retrieval controls. Similar to zif268,  
398 memory retrieval increased Arc expression relative to no-memory retrieval (**Fig. 4D**; 2 x 2 ANOVA,  
399 retrieval x treatment interaction,  $F_{(1,38)} = 5.61$ ,  $p = 0.02$ ; retrieval main effect,  $F_{(1,38)} = 13.03$ ,  $p =$   
400  $0.0009$ ; treatment main effect,  $F_{(1,38)} = 0.53$ ,  $p = 0.47$ ). Furthermore, systemic AM251  
401 administration after memory retrieval modestly attenuated Arc expression during memory  
402 reconsolidation relative to VEH (Sidak's test,  $p = 0.06$ ), such that Arc expression no longer differed  
403 from those in the no-memory retrieval controls.

404 Similar to IEG expression, glutamate receptor subunit phosphorylation varied as a function  
405 of memory retrieval and AM251 treatment. These results are reported in **Fig 4E-G**.

406 Src-mediated phosphorylation of NMDAR GluN2B<sup>Y1472</sup> (**pGluN2B**) facilitates proper  
407 GluN2B synaptic localization, learning, and amygdalar synaptic plasticity (Nakazawa et al., 2006).  
408 BLA pGluN2B levels varied as a function of memory retrieval and treatment (**Fig. 4F**). Memory  
409 retrieval increased pGluN2B relative to no-memory retrieval (retrieval x treatment interaction,  
410  $F_{(1,38)} = 20.74$ ,  $p < 0.0001$ ; retrieval main effect,  $F_{(1,38)} = 5.60$ ,  $p = 0.02$ ; treatment main effect,  $F_{(1,38)}$   
411  $= 1.43$ ,  $p = 0.24$ ). Systemic AM251 administration after memory retrieval reduced pGluN2B during  
412 memory reconsolidation relative to VEH (Sidak's test,  $p < 0.05$ ), such that pGluN2B levels no  
413 longer differed from those in the no-memory retrieval controls. Notably, a trend for an AM251-  
414 induced increase in total GluN2B levels (**Fig. 4-1B**; treatment main effect,  $F_{(1,38)} = 8.40$ ,  $p = 0.006$ ;  
415 retrieval main and interaction effects,  $F_{s(1,38)} \leq 3.72$ ,  $p \geq 0.06$ ) could have enhanced this effect by  
416 increasing the denominator.

417 PKA-mediated phosphorylation of AMPAR GluA1<sup>S845</sup> (**pGluA1**) promotes GluA1  
418 trafficking to the postsynaptic density and fear-memory destabilization after memory retrieval  
419 (Clem and Huganir, 2010). BLA pGluA1 levels varied as a function of memory retrieval and AM251  
420 treatment (**Fig. 4F**; retrieval x treatment interaction,  $F_{(1,38)} = 8.04$ ,  $p = 0.007$ ; retrieval main effect,  
421  $F_{(1,38)} = 7.15$ ,  $p = 0.01$ ; treatment main effect,  $F_{(1,38)} = 1.70$ ,  $p = 0.20$ ) with no change in total GluA1  
422 levels (**Fig. 4-1C**; all retrieval and treatment main and interaction effects,  $F_{s(1,38)} \leq 1.83$ ,  $p \geq 0.18$ ).

423 Memory retrieval increased pGluA1 relative to no-memory retrieval (Sidak's test,  $p < 0.05$ ).  
424 Moreover, systemic AM251 administration after memory retrieval reduced pGluA1 during memory  
425 reconsolidation relative to VEH (Sidak's test,  $p < 0.05$ ), such that pGluA1 levels no longer differed  
426 from those in no-memory retrieval controls.

427 Src-mediated phosphorylation of AMPAR GluA2<sup>Y876</sup> (**pGluA2**) disrupts GluA2 association  
428 with postsynaptic density scaffolding proteins, thereby reducing GluA2 synaptic expression  
429 (Hayashi and Huganir, 2004). Memory retrieval reduced BLA pGluA2 during memory  
430 reconsolidation relative to no-memory retrieval (**Fig. 4G**; retrieval main effect,  $F_{(1,38)} = 6.78$ ,  $p =$   
431  $0.01$ ; all treatment main and interaction effects,  $F_{S(1,38)} \leq 0.78$ ,  $p \geq 0.38$ ), without altering total  
432 GluA2 levels (**Fig. 4-1D**; all  $F_{S(1,38)} < 1.59$ ,  $p > 0.22$ ). In contrast, AM251 failed to alter pGluA2 or  
433 total GluA2 levels.

434

435 ***Experiments 1-3: Systemic CB1R antagonism during memory reconsolidation inhibits***  
436 ***molecular changes in the BLA during reinstatement three days, but not 24 days, post***  
437 ***treatment***

438 To capture potential protracted effects of AM251 on protein expression during the  
439 reinstatement test, BLA tissue was collected immediately after the 2-h test session in the cocaine-  
440 paired context in Experiments 1-3 (**Fig. 5A**). In Experiment 1, systemic AM251 administration  
441 immediately after memory retrieval (i.e., during memory reconsolidation) significantly reduced  
442 BLA zif268 ( $t_{(13)} = 2.94$ ,  $p = 0.01$ ), total GluN2B ( $t_{(13)} = 3.48$ ,  $p = 0.004$ ), and total GluA1 ( $t_{(13)} =$   
443  $4.41$ ,  $p = 0.001$ ) expression relative to VEH three days post treatment. AM251 administration also  
444 increased Arc expression ( $t_{(13)} = 4.61$ ,  $p = 0.0005$ ) and failed to alter total GluA2 levels ( $t_{(13)} =$   
445  $1.63$ ,  $p = 0.125$ ) relative to VEH at the same time point (**Fig. 5B**). Furthermore, there was a  
446 positive correlation between zif268 expression and active-lever responding at test three days after  
447 VEH treatment (**Fig. 5C**;  $r = 0.82$ ,  $p = 0.05$ ). This correlation was not observed after AM251

448 treatment ( $r = 0.31$ ,  $p = 0.46$ ) or between active-lever responding and other protein targets (**Table**  
449 **5-1**,  $r \leq 0.40$ ,  $p \geq 0.12$ ).

450 In Experiment 2, systemic AM251 administration 6 h after memory retrieval (i.e., outside  
451 the memory reconsolidation window) failed to alter BLA zif268, Arc, GluN2B, GluA1, or GluA2  
452 levels relative to VEH at test, three days post treatment (**Fig. 5D**;  $t_{(13)} \leq 0.51$ ,  $p \geq 0.61$ ).  
453 Furthermore, there was a positive correlation between BLA zif268 expression and active-lever  
454 responding at test three days after VEH treatment ( $r = 0.77$ ,  $p = 0.02$ ) and a trend for a similar  
455 positive correlation after AM251 treatment (**Fig. 5E**;  $r = 0.69$ ,  $p = 0.058$ ).

456 In Experiment 3, systemic AM251 administration immediately after memory retrieval did  
457 not alter zif268, Arc, GluN2B, GluA1, or GluA2 levels relative to VEH at test, 24 days later (**Fig.**  
458 **5F**; all  $t_{(15)} \leq 1.18$ ,  $p \geq 0.26$ ). However, there was a positive correlation between BLA zif268  
459 expression and active-lever responding at test after memory retrieval and VEH treatment (**Fig.**  
460 **5G**;  $r = 0.90$ ,  $p = 0.002$ ) and a trend for a negative correlation following AM251 treatment ( $r = -$   
461  $0.63$ ,  $p = 0.07$ ).

462

### 463 ***Experiment 5: Systemic CB1R antagonism after memory retrieval increases sEPSC*** 464 ***frequency in BLA PNs***

465 To determine if AM251-induced memory reconsolidation impairments and associated  
466 molecular changes were paralleled by changes in synaptic transmission in the BLA, whole cell  
467 patch-clamp recordings were obtained from BLA PNs in slices prepared on average 30 min after  
468 memory retrieval or no-memory retrieval and systemic AM251 or VEH treatment (**Fig. 6A**).  
469 Application of the NMDAR antagonist, APV (50  $\mu\text{M}$ ), was used to pharmacologically isolate the  
470 AMPAR component, and subsequent digital subtraction revealed the NMDA component, of the  
471 composite eEPSC (**Fig. 6B**). The AMPAR and NMDAR components were operationalized as the  
472 peak amplitude and the amplitude at 50 ms of the composite response, respectively. Neither  
473 memory retrieval nor AM251 altered the AMPAR-mediated eEPSC amplitude (**Fig. 6C-D**;

474 ANOVA, all retrieval and treatment  $F_{S(1,19)} \leq 0.57$ ,  $p \geq 0.46$ ), NMDAR-mediated eEPSC amplitude  
475 (**Fig. 6E**; ANOVA, all  $F_{S(1,18)} \leq 3.89$ ,  $p \geq 0.06$ ), or the AMPA/NMDA eEPSC amplitude ratio (**Fig.**  
476 **6F**; ANOVA, all  $F_{S(1,17)} \leq 2.73$ ,  $p \geq 0.12$ ).

477 In contrast to the lack of effects on eEPSCs, the sEPSC frequency varied as a function of  
478 memory retrieval and systemic AM251 treatment (**Fig. 6G**). Memory retrieval followed by VEH did  
479 not alter the mean sEPSC frequency relative to no-memory retrieval (ANOVA, retrieval x  
480 treatment interaction,  $F_{(1,18)} = 6.95$ ,  $p = 0.02$ ; all other  $F_{S(1,18)} \leq 4.17$ ,  $p \geq 0.06$ ). However, AM251  
481 administration after memory retrieval, but not after no-memory retrieval, increased the mean  
482 sEPSC frequency relative to VEH (**Fig. 6H**; Sidak's test,  $p < 0.05$ ) and produced a leftward shift  
483 in the cumulative probability distribution of sEPSC inter-event intervals relative to VEH after  
484 memory retrieval or AM251 after no-memory retrieval (**Fig. 6I**; Kruskal-Wallis test,  $H_{(3)} = 72.14$ ,  $p$   
485  $< 0.0001$ , Dunn's test,  $p < 0.05$ ). The effect of memory retrieval on sEPSC amplitude was also  
486 dependent on memory retrieval and treatment (**Fig. 6J**; ANOVA, context x treatment interaction,  
487  $F_{(1,20)} = 4.737$ ,  $p = 0.04$ ; all other  $F_{S(1,20)} \leq 0.22$ ,  $p \geq 0.65$ ), but *post-hoc* comparisons did not  
488 indicate group differences. Memory retrieval followed by VEH produced a leftward shift in the  
489 cumulative probability distribution of sEPSC amplitudes relative to no-memory retrieval (Kruskal-  
490 Wallis test,  $H_{(3)} = 11.67$ ,  $p = 0.01$ , Dunn's test,  $p < 0.05$ ), and AM251 administration after memory  
491 retrieval inhibited this shift relative to VEH (**Fig. 6K**; Dunn's test,  $p < 0.05$ ).

492 To verify our measurements of non-pharmacologically separated composite EPSCs, we  
493 repeated our measurements on pharmacologically isolated AMPAR eEPSCs (**Fig. 7A**). In the  
494 presence of the NMDAR antagonist, AP5 (50  $\mu$ M), neither memory retrieval nor systemic AM251  
495 administration altered synaptic responses to IC stimulation, including peak AMPAR eEPSC  
496 amplitude at -60 mV (**Fig. 7B**; ANOVA, all  $F_{S(1,35)} \leq 3.30$ ,  $p \geq 0.08$ ) and +30 mV (**Fig. 7C**; ANOVA,  
497 all  $F_{S(1,35)} \leq 0.68$ ,  $p \geq 0.42$ ), or the AMPAR rectification index (**Fig. 7D**; ANOVA, all  $F_{S(1,34)} \leq 0.11$ ,  
498  $p \geq 0.75$ ).

499 In the presence of AP5, the mean AMPAR sEPSC frequency varied as a function of  
500 memory retrieval and AM251 treatment (**Fig. 7E**). Memory retrieval followed by VEH did not alter  
501 mean sEPSC frequency relative to no-memory retrieval (ANOVA, retrieval x treatment interaction,  
502  $F_{(1,41)} = 5.53$ ,  $p = 0.02$ ; retrieval main effect,  $F_{(1,41)} = 6.24$ ,  $p = 0.02$ ; treatment main effect,  $F_{(1,41)} =$   
503  $1.68$ ,  $p = 0.20$ ). However, systemic AM251 administration after memory retrieval, but not after no-  
504 memory retrieval, increased sEPSC frequency relative to VEH (**Fig. 7F**; Sidak's test,  $p < 0.05$ )  
505 and produced a leftward shift in the cumulative probability distribution of sEPSC inter-event  
506 intervals relative to VEH after memory retrieval or AM251 after no-memory retrieval (**Fig. 7G**;  
507 Kruskal-Wallis test,  $H_{(3)} = 43.18$ ,  $p < 0.0001$ ; Dunn's test,  $p < 0.05$ ). Neither memory retrieval nor  
508 AM251 treatment altered the mean amplitude of sEPSCs (**Fig. 7H**; ANOVA, all  $F_{s(1,43)} \leq 0.73$ ,  $p \geq$   
509  $0.41$ , Fig. figure caption) or the cumulative probability distribution of sEPSC amplitudes (**Fig. 7I**;  
510 Kruskal-Wallis test,  $H_{(3)} = 0.28$ ,  $p = 0.96$ ).

## 511 **DISCUSSION**

512 The main finding of this study is that CB1R signaling critically modulates memory  
513 reconsolidation processes necessary for subsequent drug context-induced cocaine-seeking  
514 behavior in an instrumental model of drug relapse. Furthermore, memory retrieval induces CB1R-  
515 dependent changes in IEG expression, glutamatergic receptor subunit phosphorylation, and  
516 excitatory synaptic transmission in the BLA during memory reconsolidation, and some of these  
517 changes are predictive of the magnitude of subsequent drug-seeking behavior.

518 Systemic CB1R antagonism during cocaine-memory reconsolidation (i.e., immediately  
519 after memory retrieval) reduced drug context-induced cocaine-seeking behavior three days later,  
520 relative to VEH (**Fig. 1**). The CB1R antagonist, AM251 does not alter inhibitory avoidance (Gobira  
521 et al., 2013) or grooming behaviors (Hodge et al., 2008) at similar doses, suggesting that AM251  
522 is not acutely aversive. Furthermore, CB1R antagonism alone did not alter the expression of drug-  
523 seeking behavior despite its long half-life (i.e., 22-h; McLaughlin et al., 2003) (**Fig. 2**). These

524 observations suggest that CB1R signaling is necessary for cocaine-memory reconsolidation in an  
525 instrumental model of drug relapse, thereby expanding on the known involvement of CB1Rs in  
526 Pavlovian morphine, nicotine, and methamphetamine memory reconsolidation (Yu et al., 2009;  
527 Fang et al., 2011; De Carvalho et al., 2014). CB1R signaling is not required for social reward  
528 memory reconsolidation (Achterberg et al., 2014); as such, selective effects of CB1R antagonism  
529 on memory reconsolidation across drug classes and paradigms are especially encouraging from  
530 a substance use disorder treatment perspective.

531         Systemic CB1R antagonism inhibited molecular adaptations in the BLA during memory  
532 reconsolidation and at the time of the test for drug context-induced cocaine-seeking behavior  
533 three days later. Specifically, memory retrieval augmented zif268 and Arc expression during  
534 memory reconsolidation, and this effect was blocked by AM251 (**Fig. 4**). CB1R-dependent IEG  
535 expression in the BLA is probably required for memory re-stabilization given that intra-BLA zif268  
536 or Arc antisense administration disrupts cocaine-CPP and explicit conditioned stimulus (CS)-  
537 cocaine-memory reconsolidation in other paradigms (Lee et al., 2005, 2006; Theberge et al.,  
538 2010; Alaghband et al., 2014). At test, there was a CB1R-dependent, positive relationship  
539 between the extent of BLA zif268 expression and the magnitude of drug context-induced cocaine-  
540 seeking behavior (**Fig. 5C**). This finding is consistent with reports of increased zif268 mRNA  
541 expression during reinstatement (Hearing et al., 2010; Ziłkowska et al., 2011) and suggests that  
542 BLA zif268 expression tracks drug context-induced motivation for cocaine. However, the *memory*  
543 *retrieval-dependent* AM251 effects indicate that diminished motivation for cocaine at test is due  
544 to CB1R antagonist-induced impairment in cocaine-memory strength or retrieval link  
545 establishment during memory reconsolidation.

546         Interestingly, cocaine-memory retrieval triggered CB1R-dependent increases in  
547 pGluN2B<sup>Y1472</sup> and pGluA1<sup>S845</sup>, consistent with enhanced GluN2B synaptic stability (Nakazawa et  
548 al., 2006) and GluA1 synaptic recruitment (Hong et al. 2010), respectively, as well as CB1R-

549 independent decreases in pGluA2<sup>Y876</sup> (**Fig. 4**). Previous research has indicated the necessity of  
550 PKA activation (Arguello et al. 2014) and the importance of NMDAR-dependent CI-AMPAR  
551 (GluA2-containing) endocytosis followed closely by CP-AMPAR (GluA2-lacking) synaptic  
552 trafficking in the amygdala for memory reconsolidation (Clem and Huganir, 2010; Hong et al.,  
553 2013; Lopez et al., 2015; Yu et al., 2016). In our study, decreases in pGluA2<sup>Y876</sup>, consistent with  
554 diminished Src-mediated CI-AMPAR endocytosis (Hayashi and Huganir, 2004), likely captured a  
555 time point when CI-AMPAR synaptic expression was restored after transient endocytosis, while  
556 CP-AMPAR synaptic insertion was still ongoing (Rao-Ruiz et al. 2015). Thus, cocaine-memory  
557 reconsolidation may involve CB1R- and NMDAR-dependent CP-AMPAR synaptic insertion and  
558 CB1R-independent CI-AMPAR endocytosis.

559         The robust effects of memory retrieval on IEG expression and glutamate-receptor subunit  
560 phosphorylation were paralleled by subtle influences on BLA synaptic physiology observed in  
561 slices prepared on average 30 min after memory retrieval and systemic AM251 treatment. During  
562 reconsolidation, IC stimulation did not reveal changes in AMPA/NMDA ratio, eEPSC peak  
563 amplitude, or eEPSC rectification in BLA PNs (**Fig. 6-7**). Similarly, fear-memory reconsolidation  
564 is associated with equal-conductance exchange of CI-AMPARs to CP-AMPARs and no change  
565 in IC→BLA synaptic strength, with a transient increase in rectification reported in slices prepared  
566 5 min, but not one hour, after memory retrieval (Hong et al. 2013; Rao-Ruiz et al. 2015). Since  
567 we observed molecular changes in the BLA 45 min after memory retrieval (**Fig. 4**), it is possible  
568 that the temporal dynamics of IC→BLA synaptic plasticity during cocaine-memory and fear-  
569 memory reconsolidation differ, or the timing of our synaptic physiology protocols did not permit  
570 the detection of transient changes in rectification. Finally, the observed molecular adaptations in  
571 the BLA might reflect changes in receptor trafficking at *non*-IC→BLA synapses or other cell types  
572 (i.e., GABAergic interneurons).

573           Importantly, we discovered memory retrieval-dependent increases in sEPSC frequency  
574 and reductions in peak sEPSC amplitude in BLA PNs (selected based on their responsiveness to  
575 IC stimulation, **Fig. 6-7**). Moreover, sEPSC frequency increases were only observed when CB1Rs  
576 were blocked. This suggests that potential cocaine-memory retrieval-associated plasticity occurs  
577 at *non*-IC excitatory inputs to BLA PNs (e.g., sensory cortices, prefrontal cortex, or ventral  
578 hippocampus; LeDoux, 2007; Sah et al., 2003), and systemic CB1R antagonism enables  
579 potentiation at these inputs, and may create “synaptic noise” that impedes plasticity associated  
580 with memory strength or reconsolidation. Thus, CB1R signaling may facilitate memory  
581 reconsolidation by reducing “synaptic noise.” Additionally, memory retrieval-dependent reductions  
582 in sEPSC peak amplitude (**Fig. 6J-K**) were observed in a CB1R- and NMDAR-dependent manner  
583 (**Fig. 7H-I**). If the rising phase of the NMDAR component contributed to the peak composite  
584 sEPSC, then increases in BLA pGluN2B<sup>Y1472</sup> (**Fig. 4**) may explain the reductions in sEPSC  
585 amplitude given the lower open probability of GluN2B-containing NMDARs (Paoletti et al., 2013).  
586 The involvement of GluN2B in appetitive memory reconsolidation has not been investigated until  
587 now, but earlier studies indicate that GluN2B mediates Pavlovian fear-memory destabilization,  
588 but not re-stabilization (Ben Mamou et al., 2006; Milton et al., 2013). Consequently, future  
589 research will need to evaluate whether the contributions of GluN2B-containing NMDARs to  
590 memory reconsolidation are paradigm specific.

591           Collectively, cocaine-memory reconsolidation involves at least two forms of plasticity at  
592 BLA PN synapses: (a) a memory retrieval-induced increase in excitability or vesicle release  
593 probability of glutamatergic afferents that is inhibited by CB1R signaling and (b) an NMDAR- and  
594 CB1R-dependent decrease in sEPSC amplitude. The former finding implies that CB1R signaling  
595 is necessary to *reduce* glutamatergic synaptic excitation of BLA PNs during memory  
596 reconsolidation. Initially, this appears to be contradictory to effects of CB1R antagonism on  
597 memory reconsolidation in the present study and to the known role of glutamate in memory



598 reconsolidation (Milton et al., 2008; Rao-Ruiz et al., 2015). However, it is consistent with the  
599 recognized role of CP-AMPA receptors in synaptic scaling, a plasticity mechanism important for  
600 rebalancing neuronal excitability (Diering and Huganir, 2018). CP-AMPA receptors preferentially  
601 accumulate at synapses after LTP (Turrigiano, 2008; Turrigiano et al., 2014; Diering and Huganir,  
602 2018) and facilitate synaptic resistance to down-scaling and ubiquitination (Diering et al., 2014;  
603 Sanderson et al., 2016). Future studies will need to investigate whether synaptic scaling is a  
604 plasticity mechanism of memory reconsolidation.

605         Contrary to our hypothesis, the effects of AM251 on drug-seeking behavior and BLA  
606 protein expression were not present 24 days post treatment (**Fig. 5**). Transient amnesia could  
607 result from AM251-induced enhancement in extinction memory consolidation followed by  
608 spontaneous recovery. However, this was unlikely because brief re-exposure to the cocaine-  
609 paired context did not elicit either appreciable behavioral extinction or synaptic depression in  
610 IC→BLA synapses, a phenomenon associated memory extinction (Clem and Huganir, 2010; Rich  
611 et al., 2019). Furthermore, testing occurred immediately after two extinction sessions, as opposed  
612 to after time away from the testing environment that is required for spontaneous recovery  
613 (Rescorla, 2004). It is more likely, instead, that the transient effects of AM251 reflected the  
614 delayed availability of alternate memory traces following amnesia due to reconsolidation  
615 interference (Nadel and Moscovitch, 1997). Alternatively, AM251 could inhibit neural ensembles  
616 that form “retrieval links” (Lewis et al., 1968). Consistent with this idea, reactivation of neural  
617 ensembles that are active during encoding is necessary and sufficient for memory expression  
618 (Ramirez et al., 2013; Roy et al., 2016; Richards and Frankland, 2017).

619         In conclusion, systemic administration of AM251 in conjunction with re-exposure to the  
620 cocaine-paired context, a manipulation analogous to exposure therapy, blocks glutamatergic  
621 mechanisms associated with memory reconsolidation and transiently alleviates drug context-  
622 induced motivation to seek cocaine in a rodent model of drug relapse. Thus, AM251 may provide

623 short-term benefit for individuals with cocaine-use disorders, similar to  $\beta$ -adrenergic receptor  
624 antagonism (Saladin et al., 2013). Furthermore, the CB1R may be a suitable therapeutic target  
625 for interference with the reconsolidation of maladaptive memories, even though AM251 also has  
626 some efficacy as a GPR55 (CB1 orphan receptor) agonist (Kapur et al., 2009) and  $\mu$ -opioid  
627 receptors antagonist (Seely et al., 2012). While additional research is needed to determine the  
628 exact mechanisms of action for AM251, the present findings are interesting from a  
629 pharmacotherapeutic perspective. *Chronic* daily treatment with the CB1R inverse agonist,  
630 rimonabant, is effective for smoking cessation but produces detrimental side effects (Moreira and  
631 Crippa, 2009). Therefore, future studies will need to examine whether a less extensive regimen  
632 of *repeated* post-retrieval administration of AM251 or other CB1R antagonists can safely produce  
633 lasting reductions in cue reactivity and cocaine seeking without detrimental side effects.

634

635 **Figure 1. Systemic AM251 administration *during* memory reconsolidation reduces drug**  
636 **context-induced cocaine-seeking behavior three days later. (A)** Experimental timeline. The  
637 15-min memory-retrieval session was immediately followed by systemic AM251 (AM; 3 mg/kg,  
638 i.p.;  $n = 8$ ) or VEH ( $n = 7$ ) administration. After at least two additional daily extinction sessions,  
639 drug-seeking behavior was assessed in the cocaine-paired context. **(B)** Lever responses and  
640 cocaine infusions during drug self-administration (last 10 d) and extinction training. **(C)** Active-  
641 lever responses during the memory retrieval session in the cocaine-paired context before  
642 treatment (*arrow*) and upon first re-exposure to the extinction context and the cocaine-paired  
643 context at test. **(D)** Time course of active-lever presses in the cocaine-paired context at test.  
644 **Symbols:** ANOVA #context simple main effect, Sidak's test,  $p < 0.05$ ; \*treatment simple main  
645 effect, Sidak's test,  $p < 0.05$  (Panel C), Tukey's test,  $p < 0.05$  (Panel D); †time simple main effects  
646 (VEH: interval 1 > 2-6; AM251: intervals 1-2 > 4-6), Tukey's tests,  $ps < 0.05$ .

647 **FIGURE 1**

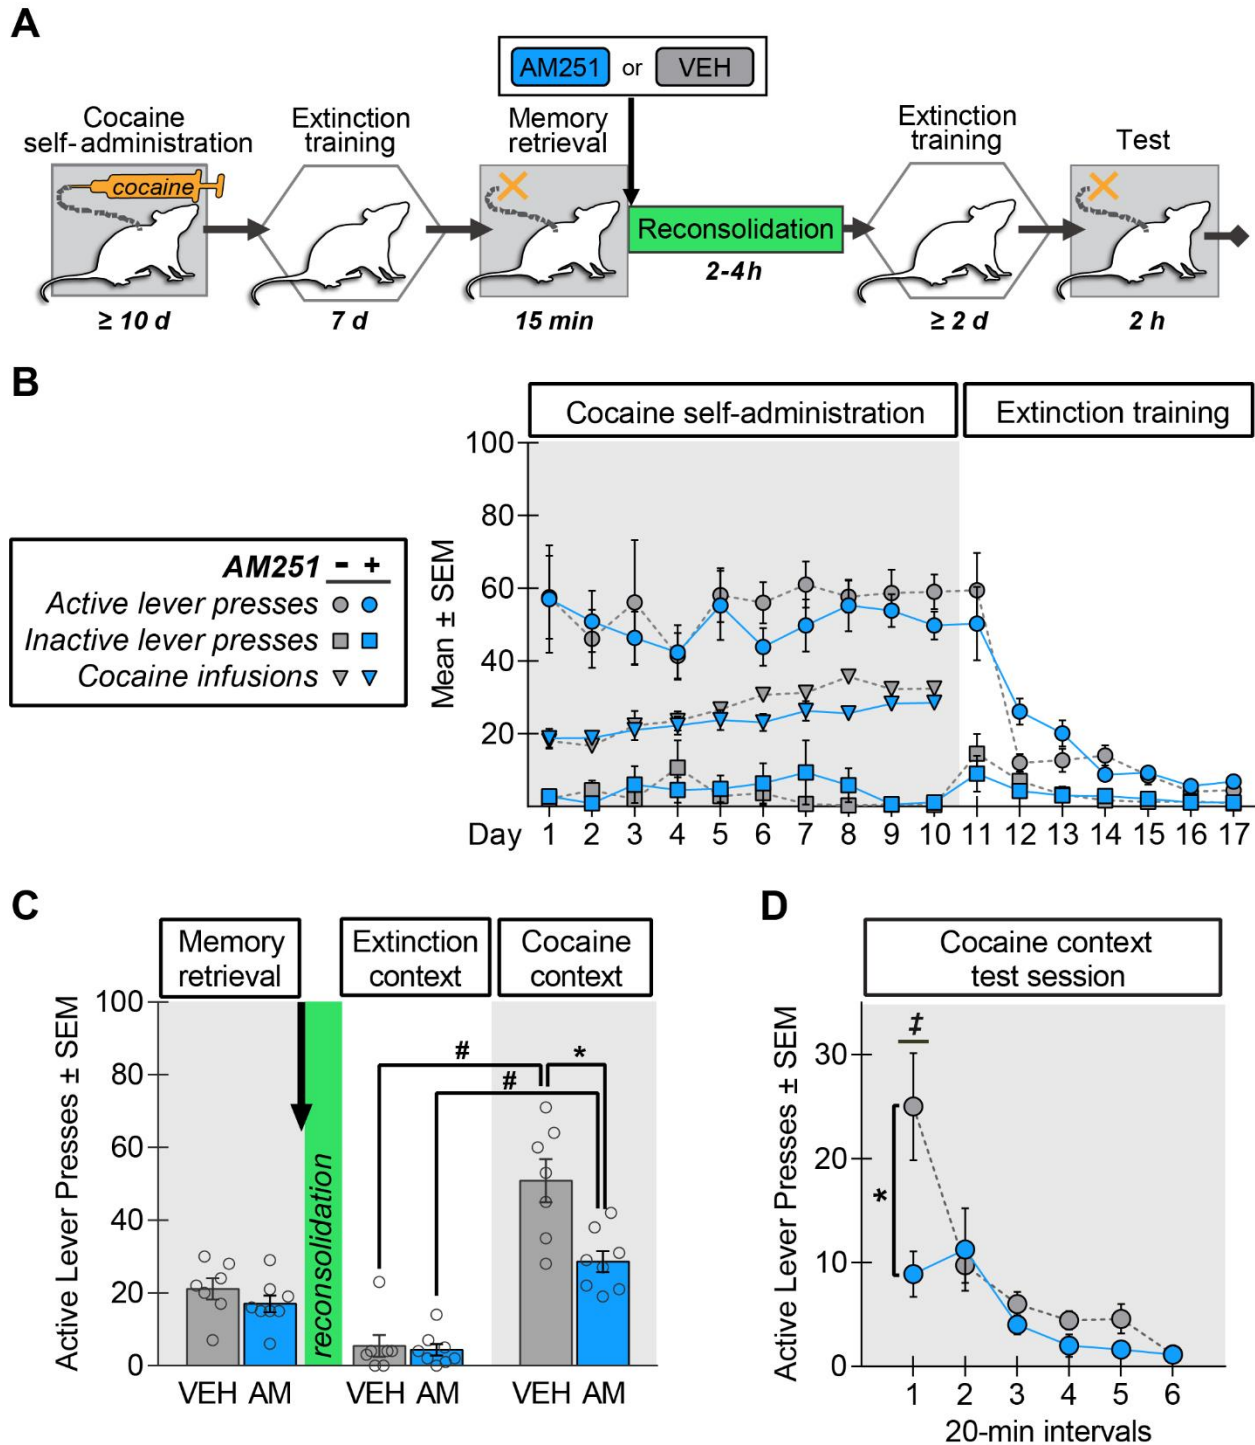

648

649

650

651 **Figure 2. Systemic AM251 administration *after* memory reconsolidation fails to alter**  
652 **context-induced cocaine-seeking behavior three days later. (A)** Experimental timeline. The  
653 15-min memory-retrieval session was followed by systemic AM251 (AM; 3 mg/kg, i.p.;  $n = 8$ ) or  
654 VEH ( $n = 9$ ) administration 6 hours later (i.e., outside of the memory reconsolidation window).  
655 After at least two additional daily extinction sessions with  $\leq 25$  active-lever responses, drug-  
656 seeking behavior was assessed in the cocaine-paired context. **(B)** Lever responses and cocaine  
657 infusions during drug self-administration and extinction training. **(C)** Active-lever responses during  
658 the memory retrieval session in the cocaine-paired context before treatment (*arrow*) and upon  
659 first re-exposure to the extinction context and the cocaine-paired context at test. **(D)** Time course  
660 of active-lever responses across in the cocaine-paired context at test. Omnibus ANOVA effects  
661 are reported in the Results section. **Symbols:** ANOVA #context main effect,  $p < 0.05$ ; †time simple  
662 main effects (interval 1 > 2-6), Tukey's tests,  $ps < 0.05$ .

663 **FIGURE 2**

**A**

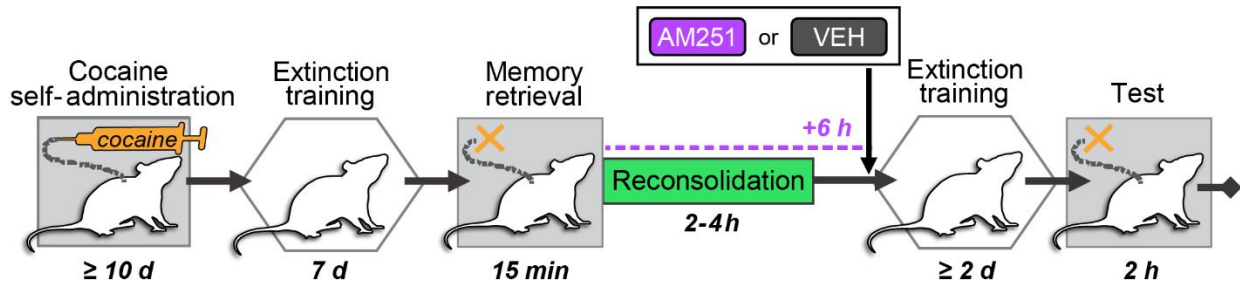

**B**

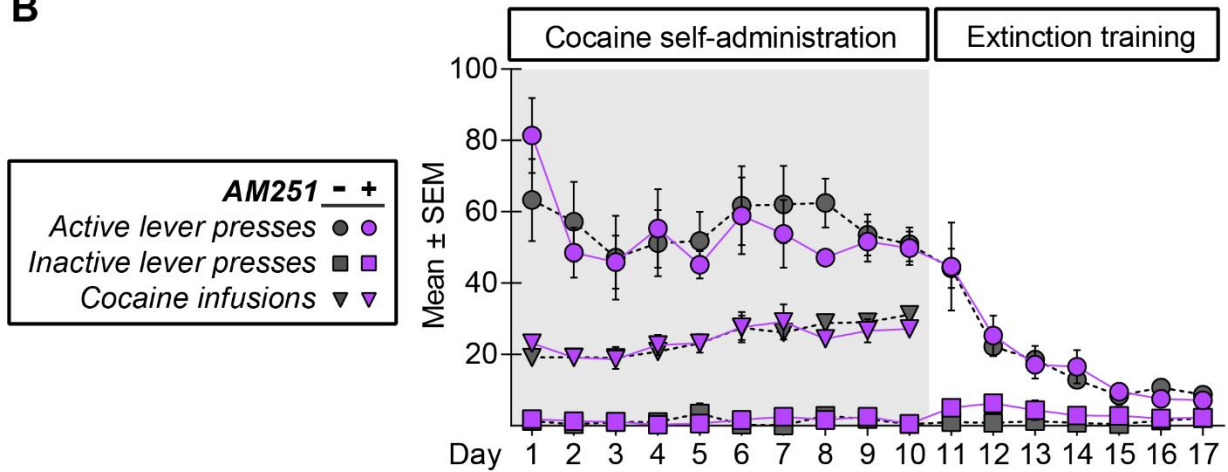

**C**

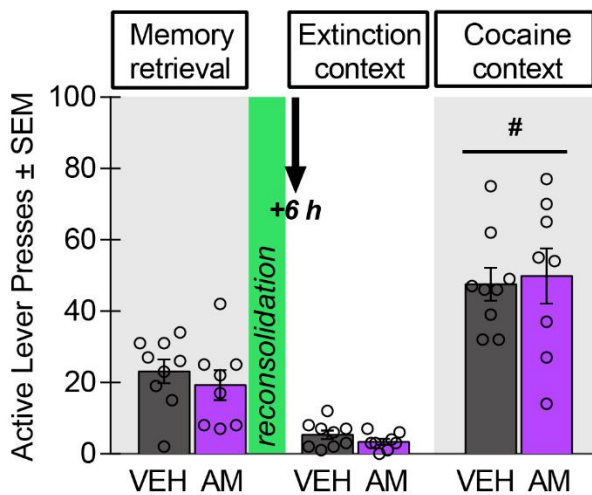

**D**

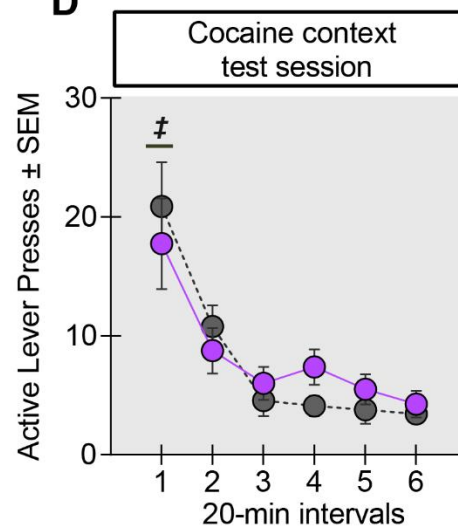

664

665

666 **Figure 3. Systemic AM251 administration *during* memory reconsolidation does not alter**  
667 **drug context-induced cocaine-seeking behavior 24 days later. (A)** Experimental timeline. The  
668 15-min memory-retrieval session was immediately followed by systemic administration of AM251  
669 (AM; 3 mg/kg, i.p.;  $n = 9$ ) or VEH ( $n = 8$ ). After 21 days of home cage stay, rats received at least  
670 two additional daily extinction sessions with  $\leq 25$  active-lever responses prior to the test of drug-  
671 seeking behavior in the cocaine-paired context. **(B)** Lever responses and cocaine infusions during  
672 drug self-administration and extinction training. **(C)** Active-lever responses during the memory-  
673 retrieval session in the cocaine-paired context before treatment (*arrow*) and after treatment  
674 followed by 21 days of home cage stay, upon first re-exposure to the extinction context and the  
675 cocaine-paired context at test. **(D)** Time course of active-lever responses in the cocaine-paired  
676 context at test. **Symbols:** ANOVA #context main effect,  $p < 0.05$ ; †time simple main effects  
677 (interval 1 > 2-6), Tukey's tests,  $ps < 0.05$ .

678 **FIGURE 3**

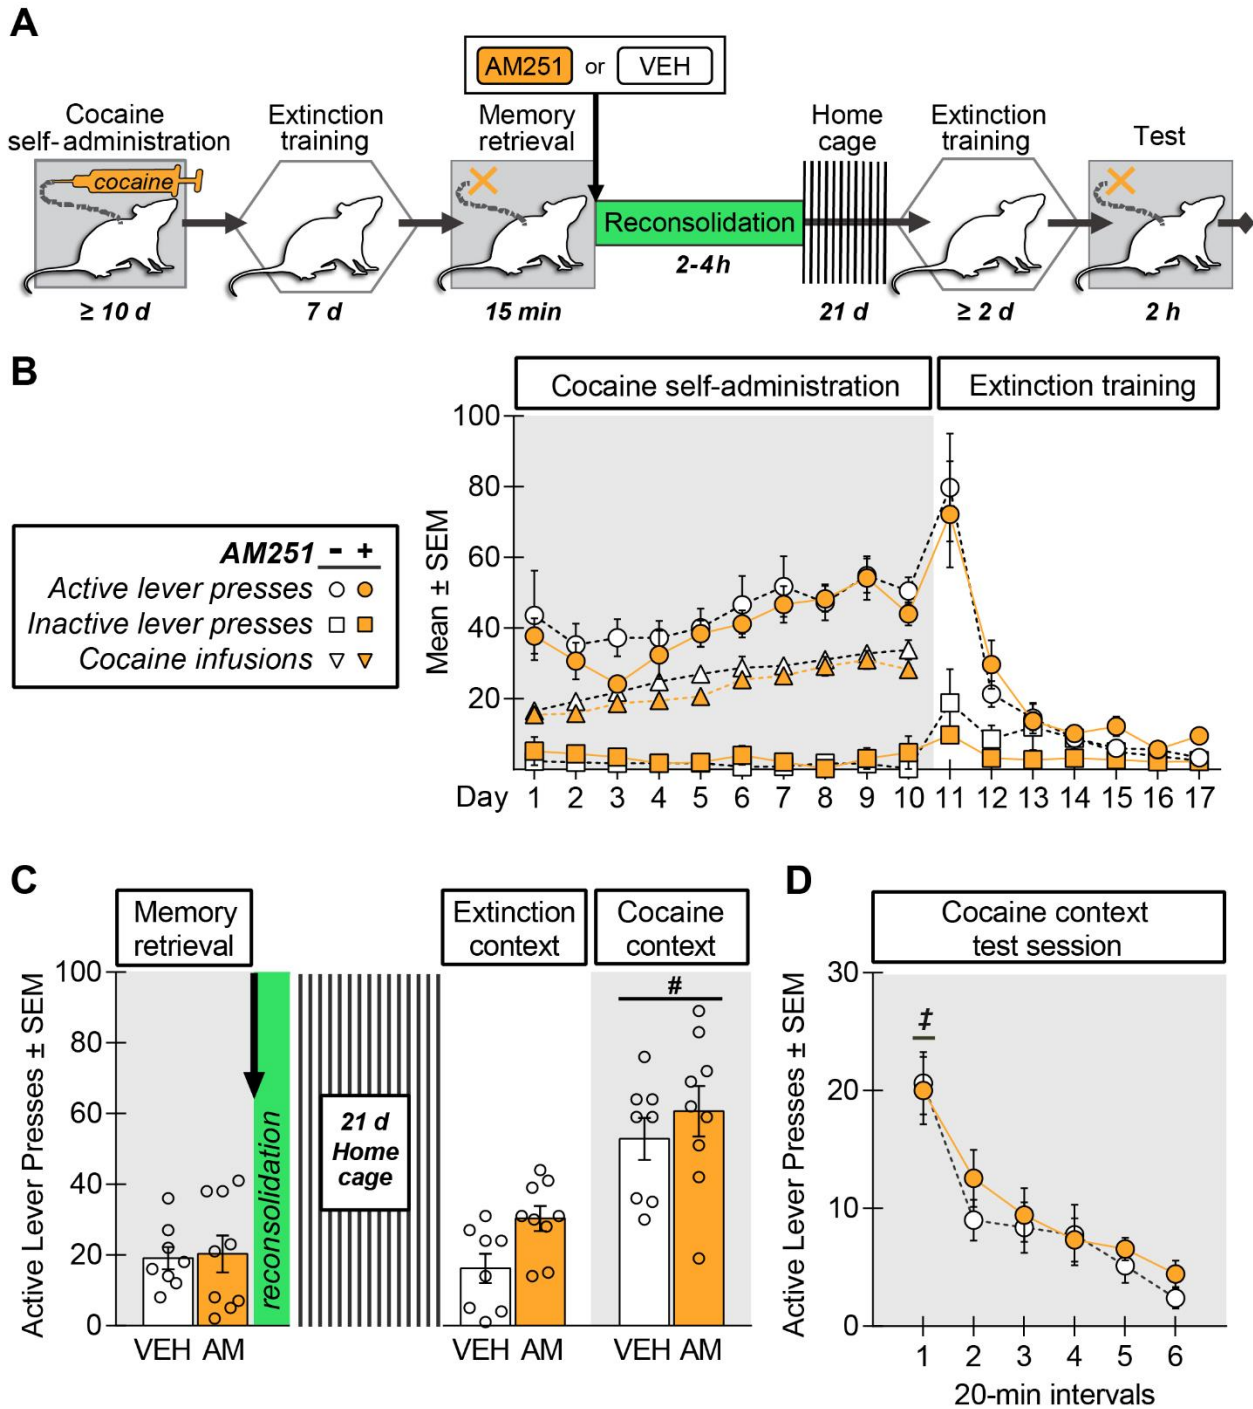

679

680

681



682 **Figure 4. Systemic AM251 administration after memory retrieval prevents changes in BLA**  
683 **IEG expression and glutamate receptor subunit phosphorylation during memory**  
684 **reconsolidation. (A)** Experimental timeline. Systemic AM251 (3 mg/kg, i.p.) or VEH was  
685 administered immediately after cocaine-memory retrieval or no-memory retrieval ( $n = 10$  to 11 per  
686 group). BLA tissue samples were collected 45 min later for analysis of full tissue homogenates.  
687 **(B)** Representative western blots. Mean **(C)** zif268 and **(D)** ARC levels normalized to the loading  
688 control, calnexin (CNX). Mean levels of **(E)** GluN2B phosphorylation at Y1472 (pGluN2B), **(E)**  
689 GluA1 phosphorylation at S845 (pGluA1), and **(F)** GluA2 phosphorylation at Y876 (pGluA2)  
690 normalized to total protein levels. See extended **Figure 4-1** for control protein measures. Values  
691 are expressed as a percentage of the no-memory retrieval VEH control group. **Symbols:** ANOVA,  
692 #retrieval simple main effect, Sidak's test,  $p < 0.05$ , \*treatment simple main effect, Sidak's test,  $p$   
693  $< 0.05$ , †retrieval main effect,  $p < 0.05$ .

694 **FIGURE 4**

695

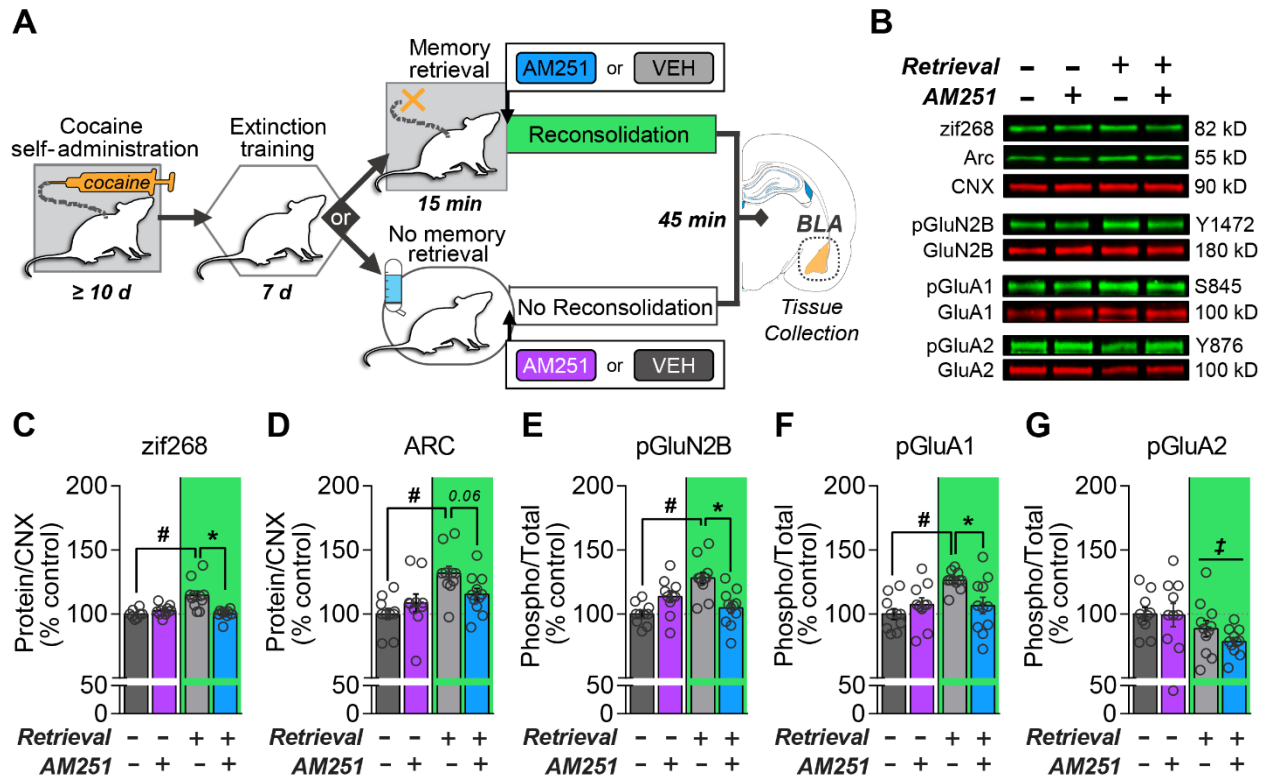

700 **Figure 5. Systemic AM251 administration after memory retrieval elicits time-dependent**  
701 **changes in BLA IEG and total glutamate receptor subunit expression levels at test and in**  
702 **relationship with the magnitude of drug-seeking behavior. (A)** Experimental timeline.  
703 Systemic AM251 (AM; 3 mg/kg, i.p.) or VEH was administered immediately or six hours after  
704 cocaine-memory retrieval. Cocaine-seeking behavior was assessed in the cocaine-paired context  
705 three or 24 days later, after at least two extinction sessions in Experiments 1-3. BLA tissue  
706 samples were collected immediately after the test session. **(B)** Effects of systemic AM251  
707 administration immediately after memory retrieval on total protein levels (mean  $\pm$  SEM) in the BLA  
708 at test, three days later in Experiment 1. **(C)** Relationship between total zif268 protein levels and  
709 active-lever presses at test in Experiment 1. **(D)** Effects of systemic AM251 administration 6 hours  
710 after memory retrieval on total protein levels (mean  $\pm$  SEM) in the BLA at test, three days later in  
711 Experiment 2. **(E)** Relationship between total zif268 protein levels and active-lever presses at test  
712 in Experiment 2. **(F)** Effects of systemic AM251 administration immediately after memory retrieval  
713 on total protein levels (mean  $\pm$  SEM) in the BLA at test, 24 days later in Experiment 3. **(G)**  
714 Relationship between total zif268 protein levels and active-lever presses at test in Experiment 3.  
715 Values were normalized to the loading control, GAPDH, and expressed as a percentage of the  
716 VEH-treated group. **Symbols:** \*t-test,  $p < 0.05$ ; #Pearson's r correlation coefficient,  $p < 0.05$  ( $n =$   
717 7-9 per group).

718 **FIGURE 5**

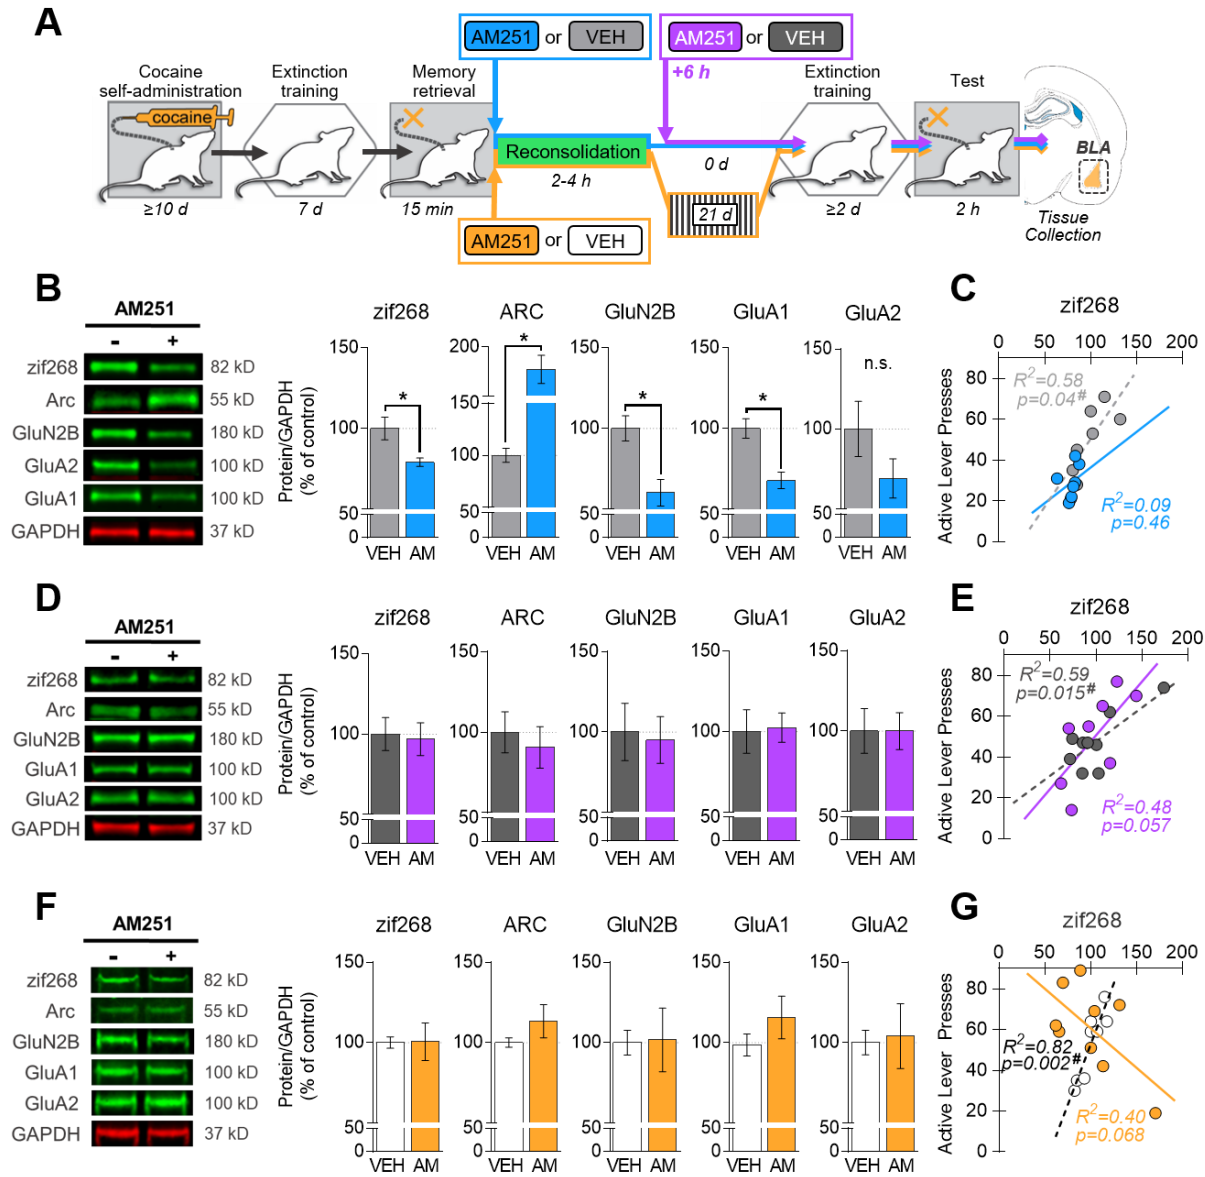

719

720

721

722 **Figure 6. Systemic AM251 administration after memory retrieval increases sEPSC**  
723 **frequency and amplitude in BLA PNs during cocaine-memory reconsolidation. (A)**  
724 Experimental timeline. AM251 (3 mg/kg, i.p.) or VEH was administered immediately after cocaine-  
725 memory retrieval or no-memory retrieval (See **Fig. 6-1** for behavioral history;  $n = 4$  to 5 per group).  
726 Brain slices were prepared for whole-cell recording within an average of 30 min after treatment.  
727 Schematic depicting stimulating electrode placement in the internal capsule and recording  
728 electrode placement in the basal nucleus. **(B)** eEPSCs (mean across all cells recorded  $\pm$  SEM)  
729 recorded at +30 mV in aCSF (*gray*) or AP5 (leaving the isolated AMPAR component, *red*), and  
730 superimposed digital subtraction (to visualize digitally-derived NMDAR component, *orange*).  
731 NMDAR-mediated eEPSC amplitudes were measured 50 ms after stimulus onset to eliminate  
732 AMPAR component contribution (*black bar*). **(C)** Representative recordings of eEPSC obtained  
733 from BLA PN cells in aCSF, in each group at -60 mV and +30 mV holding potentials. Peak  
734 amplitude of AMPA (mean  $\pm$  SEM, at -60 mV; **D**) and NMDA (mean  $\pm$  SEM, at +30 mV; **E**)  
735 components in aCSF. **(F)** AMPA/NMDA ratio (mean  $\pm$  SEM). **(G)** Representative sEPSC  
736 recordings with ticks indicating individual events. **(H)** sEPSC frequency (mean  $\pm$  SEM) and **(I)** the  
737 cumulative probability distribution of sEPSC inter-event intervals (mean  $\pm$  SEM). **(J)** sEPSC  
738 amplitude (mean  $\pm$  SEM) and **(K)** the cumulative probability distribution of sEPSC amplitudes  
739 (mean  $\pm$  SEM). **Symbols:** ANOVA, #retrieval simple main effect, Sidak's test,  $p < 0.05$ ; \*treatment  
740 simple main effect, Sidak's test,  $p < 0.05$ ; \*Kruskal-Wallis test,  $p < 0.05$ , Dunn's test,  $p < 0.05$ .

741 **FIGURE 6**

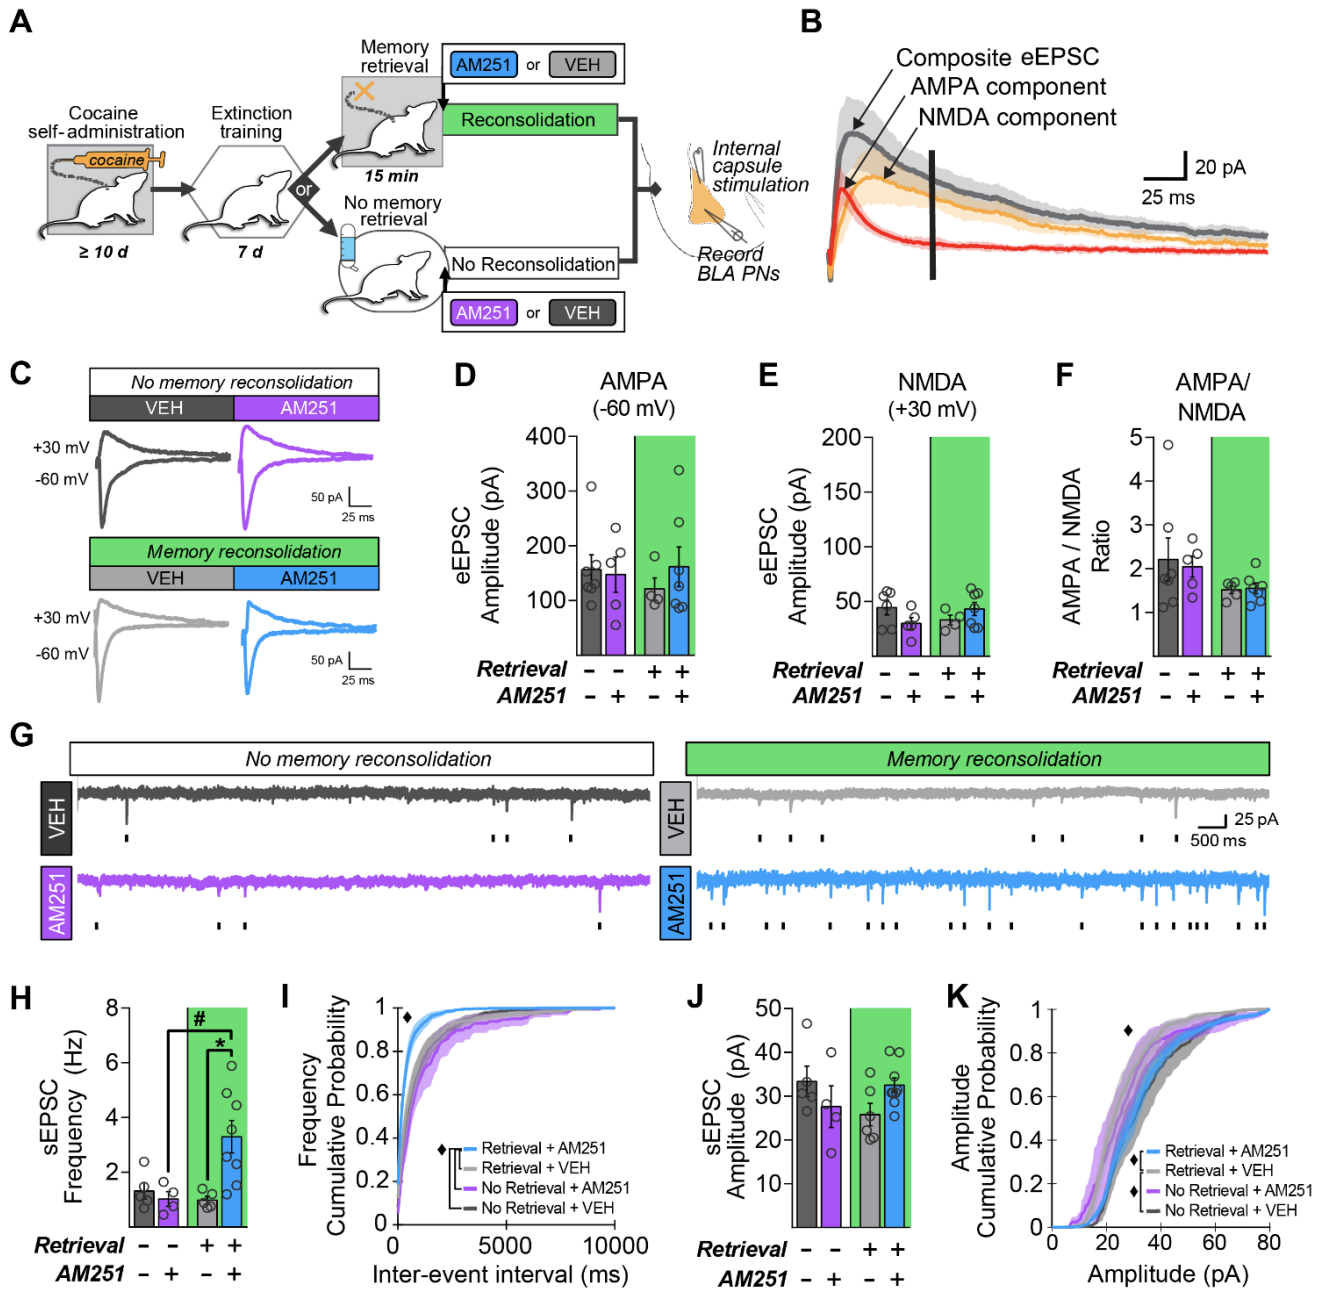

742

743

744 **Figure 7. Systemic AM251 administration after memory retrieval increases AMPAR-**  
745 **mediated sEPSC frequency in BLA PNs during cocaine-memory reconsolidation. (A)**  
746 Representative eEPSCs recordings in the presence of the NMDAR antagonist, AP5, at +30 mV  
747 and -60 mV. Peak AMPAR-mediated eEPSC amplitudes (mean  $\pm$  SEM) **(B)** at -60 mV and **(C)**  
748 +30 mV. **(D)** Rectification index calculated as the ratio of the peak eEPSC amplitude at -60 mV  
749 and +30 mV in the presence of AP5. **(E)** Representative sEPSC recordings with ticks indicating  
750 individual events. **(F)** sEPSC frequency (mean  $\pm$  SEM). **(G)** Cumulative probability distribution of  
751 sEPSC inter-event intervals (mean  $\pm$  SEM). **(H)** sEPSC amplitude (mean  $\pm$  SEM) and **(I)**  
752 cumulative probability distribution of amplitudes (mean  $\pm$  SEM). **Symbols:** ANOVA, #retrieval  
753 simple main effect, Sidak's test,  $p < 0.05$ ; \*ANOVA, treatment simple main effect, Sidak's test,  $p$   
754  $< 0.05$ ; \*Kruskal-Wallis test,  $p < 0.05$ , Dunn's test,  $p < 0.05$ .

755 **FIGURE 7**

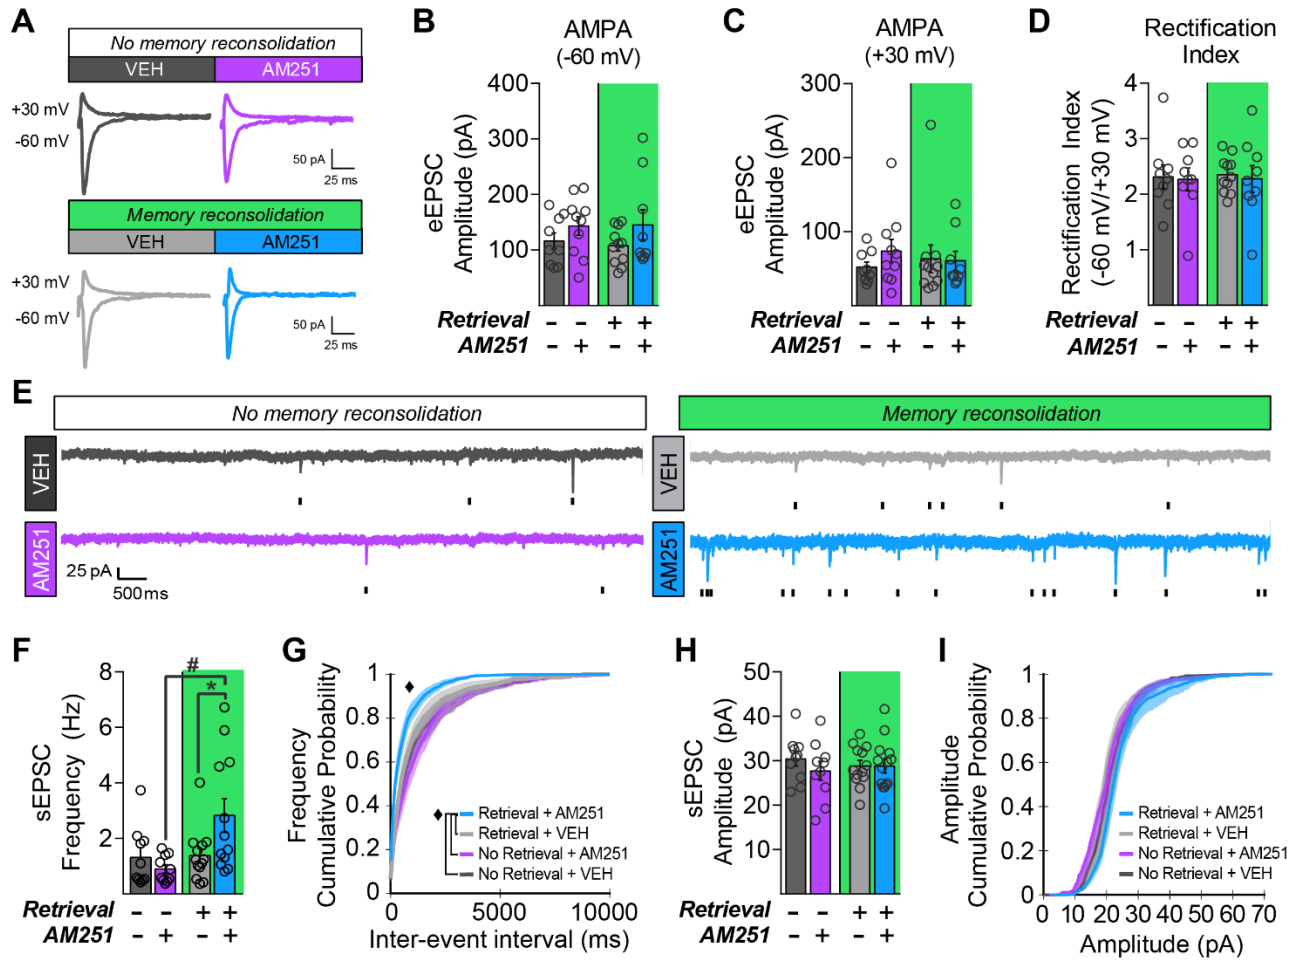

756



757 **EXTENDED DATA**

758 **FIGURE 1-1**

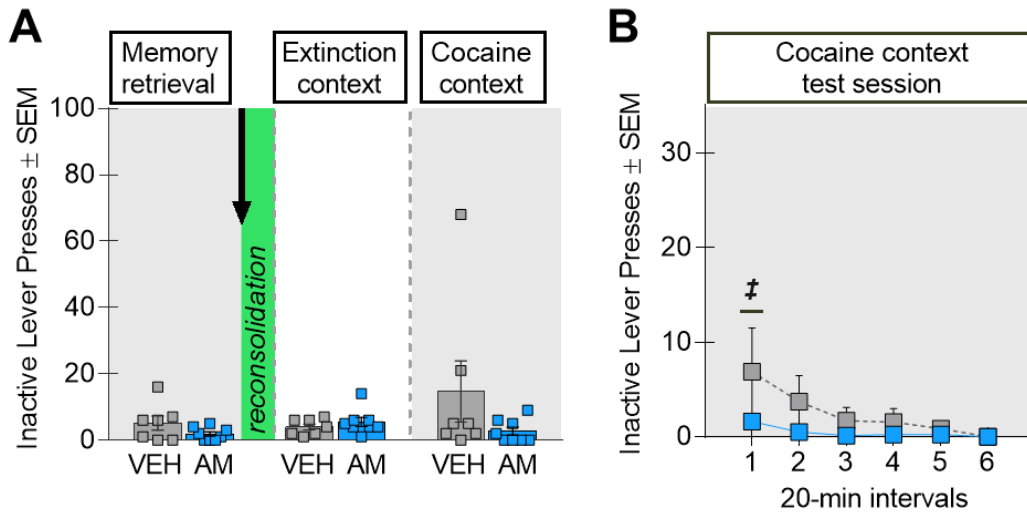

759

760 **Figure 1-1. Inactive-lever responding in Experiment 1. (A)** Inactive-lever responding was not  
761 different between the groups during the 15-min memory-retrieval session (*left panel*) before  
762 administration of AM251 (AM,  $n = 8$ ) or VEH ( $n = 7$ ) ( $t_{(13)} = 1.54$ ,  $p = 0.15$ ) (*arrow*). After treatment,  
763 inactive-lever responding remained low in the extinction and cocaine-paired contexts independent  
764 of treatment (ANOVA, all  $F_{s(1,13)} \leq 2.52$ ,  $p \geq 0.14$ ). **(B)** Inactive-lever responding in the cocaine-  
765 paired context at test declined over time independent of treatment (ANOVA, time main effect,  
766  $F_{(5,65)} = 2.71$ ,  $p = 0.03$ ,  $\#$ time simple main effects, Tukey's tests, interval 1 > 2-6,  $ps < 0.05$ ).

767 **Table 1-1 | Experiment 1 Behavioral History**

| Phase               | Measure          | Treatment Main Effects |      |           |      | Day Main Effects |       |           |         | Treatment x Day |       |           |       |
|---------------------|------------------|------------------------|------|-----------|------|------------------|-------|-----------|---------|-----------------|-------|-----------|-------|
|                     |                  | Test                   | df   | Statistic | p    | Test             | df    | Statistic | p       | Test            | df    | Statistic | p     |
| Self-Administration | Active Lever     | F                      | 1,13 | 0.60      | 0.45 | F                | 9,117 | 0.86      | 0.57    | F               | 9,117 | 0.29      | 0.74  |
|                     | Inactive Lever   | F                      | 1,13 | 2.29      | 0.15 | F                | 9,117 | 1.16      | 0.33    | F               | 9,117 | 1.20      | 0.30  |
|                     | Cocaine Infusion | F                      | 1,13 | 0.15      | 0.71 | F                | 9,117 | 20.19     | <0.0001 | F               | 9,117 | 2.84      | *0.01 |
| Extinction          | Active Lever     | F                      | 1,13 | 0.21      | 0.66 | F                | 6,78  | 38.91     | <0.0001 | F               | 6,78  | 1.91      | 0.89  |
|                     | Inactive Lever   | F                      | 1,13 | 0.22      | 0.65 | F                | 6,78  | 8.23      | <0.0001 | F               | 6,78  | 0.81      | 0.57  |
| Memory Retrieval    | Active Lever     | t                      | 13   | 0.20      | 0.67 |                  |       |           |         |                 |       |           |       |
|                     | Inactive Lever   | t                      | 13   | 3.80      | 0.07 |                  |       |           |         |                 |       |           |       |

\*VEH > AM251 on day 8

768

769

770 **FIGURE 2-1**

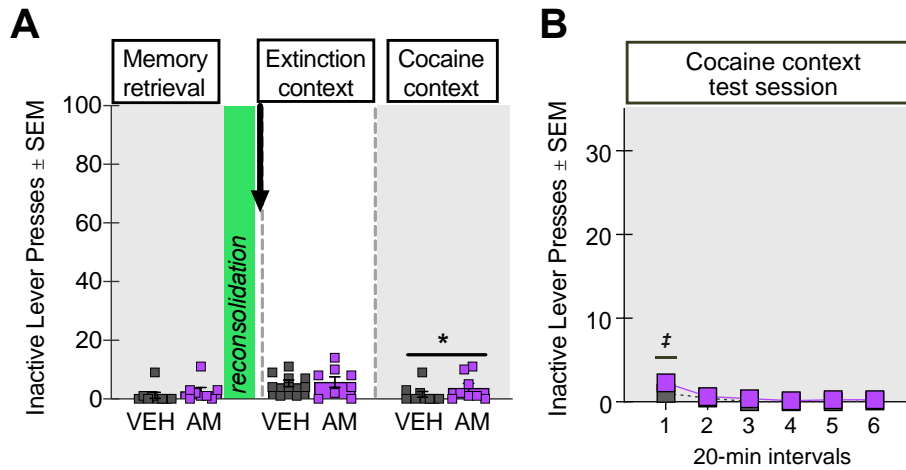

771

772 **Figure 2-1. Inactive-lever responding for Experiment 2. (A)** Inactive-lever responding was not  
773 different between the groups during the 15-min memory retrieval session (*left panel*) before  
774 administration of AM251 (AM,  $n = 8$ ) or VEH ( $n = 9$ ) ( $t_{(15)} = 0.89$ ,  $p = 0.39$ ) (*arrow*). After treatment,  
775 VEH-treated rats exhibited less inactive-lever responding in the cocaine-paired context relative to  
776 the extinction context (ANOVA, \*context main effect,  $F_{(1,15)} = 6.99$ ,  $p = 0.02$ ). **(B)** Inactive-lever  
777 responding declined over time during the test in the cocaine-paired context independent of  
778 treatment (ANOVA, time main effect,  $F_{(5,75)} = 7.35$ ,  $p < 0.0001$ ;  $\#$ time simple main effects, Tukey's  
779 tests, interval 1 > 2-6,  $ps < 0.05$ ).

780 **Table 2-1 | Experiment 2 Behavioral History**

| Phase               | Measure          | Treatment Main Effects |      |           |      | Day Main Effects |       |           |         | Treatment x Day |       |           |      |
|---------------------|------------------|------------------------|------|-----------|------|------------------|-------|-----------|---------|-----------------|-------|-----------|------|
|                     |                  | Test                   | df   | Statistic | p    | Test             | df    | Statistic | p       | Test            | df    | Statistic | p    |
| Self-Administration | Active Lever     | F                      | 1,15 | 0.18      | 0.68 | F                | 9,135 | 1.57      | 0.13    | F               | 9,135 | 0.58      | 0.81 |
|                     | Inactive Lever   | F                      | 1,15 | 0.76      | 0.65 | F                | 9,135 | 0.62      | 0.78    | F               | 9,135 | 0.76      | 0.65 |
|                     | Cocaine Infusion | F                      | 1,15 | 0.02      | 0.71 | F                | 9,135 | 7.09      | <0.0001 | F               | 9,135 | 0.90      | 0.53 |
| Extinction          | Active Lever     | F                      | 1,15 | 0.00      | 0.95 | F                | 6,90  | 29.05     | <0.0001 | F               | 6,90  | 0.27      | 0.95 |
|                     | Inactive Lever   | F                      | 1,15 | 4.48      | 0.05 | F                | 6,90  | 1.18      | 0.32    | F               | 6,90  | 1.89      | 0.09 |
| Memory Retrieval    | Active Lever     | t                      | 15   | 0.34      | 0.57 |                  |       |           |         |                 |       |           |      |
|                     | Inactive Lever   | t                      | 15   | 0.21      | 0.65 |                  |       |           |         |                 |       |           |      |

781

782 **FIGURE 3-1**

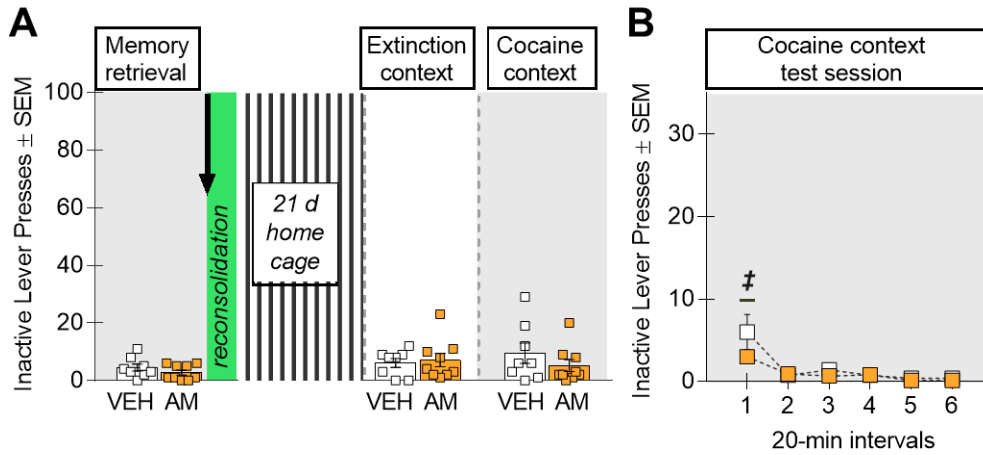

783

784 **Figure 3-1. Inactive-lever responding in Experiment 3. (A)** Inactive-lever responding was not  
785 different between the groups during the 15-min memory retrieval session (*left panel*) before  
786 administration of AM251 (AM,  $n = 9$ ) or VEH ( $n = 8$ ) ( $t_{(15)} = 1.15$ ,  $p = 0.27$ ) (*arrow*). After treatment,  
787 inactive-lever responding remained low in the extinction and cocaine-paired contexts independent  
788 of treatment (ANOVA, all  $F_{S(1,15)} \leq 1.45$ ,  $p \geq 0.25$ ). **(B)** Inactive-lever responding declined over  
789 time in the cocaine-paired context at test independent of treatment (ANOVA, time main effect,  
790  $F_{(5,75)} = 13.31$ ,  $p < 0.0001$ ; #time simple main effects, Tukey's tests, interval 1 > 2-6,  $ps < 0.05$ ).

791 **Table 3-1 | Experiment 3 Behavioral History**

| Phase               | Measure          | Treatment Main Effects |      |           |      | Day Main Effects |       |           |         | Treatment x Day |       |           |      |
|---------------------|------------------|------------------------|------|-----------|------|------------------|-------|-----------|---------|-----------------|-------|-----------|------|
|                     |                  | Test                   | df   | Statistic | p    | Test             | df    | Statistic | p       | Test            | df    | Statistic | p    |
| Self-Administration | Active Lever     | F                      | 1,15 | 0.93      | 0.35 | F                | 9,135 | 4.86      | <0.0001 | F               | 9,135 | 0.30      | 0.97 |
|                     | Inactive Lever   | F                      | 1,15 | 2.29      | 0.15 | F                | 9,117 | 0.48      | 0.89    | F               | 9,135 | 0.56      | 0.83 |
|                     | Cocaine Infusion | F                      | 1,15 | 0.75      | 0.40 | F                | 9,117 | 21.33     | <0.0001 | F               | 9,135 | 0.50      | 0.87 |
| Extinction          | Active Lever     | F                      | 1,15 | 0.19      | 0.67 | F                | 6,90  | 34.43     | <0.0001 | F               | 6,90  | 0.40      | 0.88 |
|                     | Inactive Lever   | F                      | 1,15 | 1.83      | 0.20 | F                | 6,90  | 5.15      | <0.0001 | F               | 6,90  | 1.03      | 0.41 |
| Memory Retrieval    | Active Lever     | t                      | 15   | 4.31      | 0.55 |                  |       |           |         |                 |       |           |      |
|                     | Inactive Lever   | t                      | 15   | 0.08      | 0.78 |                  |       |           |         |                 |       |           |      |

792

793 **FIGURE 4-1**

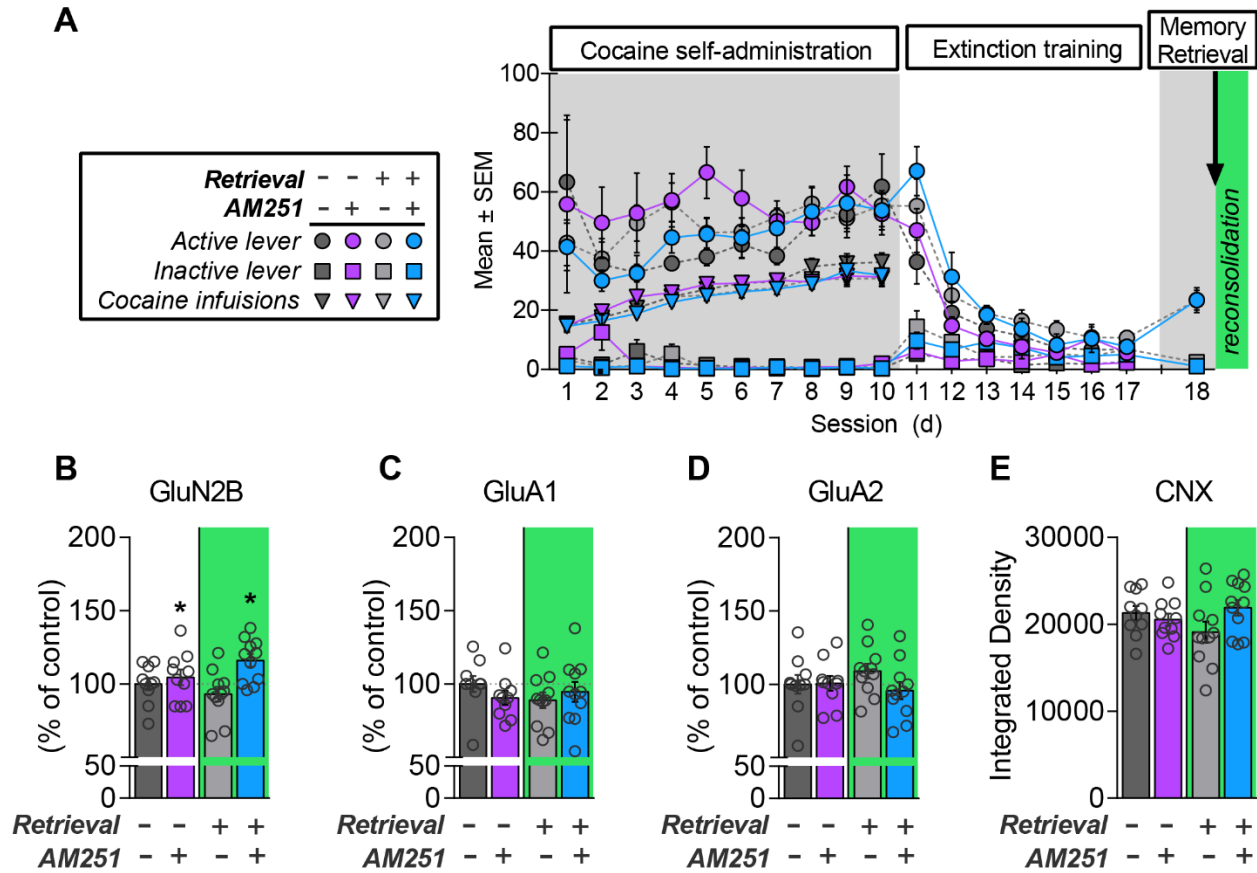

795 **Figure 4-1. Systemic AM251 treatment increases total GluN2B, but not total GluA1 or GluA2**  
 796 **levels in the BLA during memory reconsolidation. (A)** Lever responses and cocaine infusions  
 797 during drug self-administration, extinction training, and the 15-min memory-retrieval session in  
 798 the cocaine-paired context prior to treatment (*arrow*) in Experiment 4a. **(B)** AM251 increased total  
 799 GluN2B protein levels independent of memory retrieval (ANOVA, \*treatment main effect;  $p =$   
 800 0.001). There was no effect of memory retrieval or AM251 treatment on **(C)** total GluA1 or **(D)**  
 801 total GluA2 protein levels, or on **(E)** the raw integrated density values for the house-keeping  
 802 protein, calnexin (CNX).

803 **Table 4-1 | Experiment 4 Behavioral History**

| Phase               | Measure          | Treatment Main Effects |      |           |      | Day Main Effects |       |           |         | Treatment x Day |        |           |         |
|---------------------|------------------|------------------------|------|-----------|------|------------------|-------|-----------|---------|-----------------|--------|-----------|---------|
|                     |                  | Test                   | df   | Statistic | p    | Test             | df    | Statistic | p       | Test            | df     | Statistic | p       |
| Self-Administration | Active Lever     | F                      | 3,38 | 1.19      | 0.33 | F                | 9,342 | 1.96      | 0.43    | F               | 27,342 | 0.44      | 0.79    |
|                     | Inactive Lever   | F                      | 3,38 | 1.97      | 0.14 | F                | 9,342 | 3.50      | <0.0001 | F               | 27,342 | 2.47      | <0.0001 |
|                     | Cocaine Infusion | F                      | 3,38 | 0.65      | 0.59 | F                | 9,342 | 51.31     | <0.0001 | F               | 27,342 | 0.77      | 0.79    |
| Extinction          | Active Lever     | F                      | 3,38 | 2.98      | 0.04 | F                | 6,228 | 64.27     | <0.0001 | F               | 18,228 | 1.56      | 0.07    |
|                     | Inactive Lever   | F                      | 3,38 | 1.49      | 0.23 | F                | 6,228 | 5.47      | <0.0001 | F               | 18,228 | 1.21      | 0.26    |
| Memory Retrieval    | Active Lever     | t                      | 20   | 0.94      | 0.34 |                  |       |           |         |                 |        |           |         |
|                     | Inactive Lever   | t                      | 20   | 1.31      | 0.27 |                  |       |           |         |                 |        |           |         |

804



805 **Table 5-1 | Relationship between total protein levels and active-lever presses at test**

| Target Protein | Experiment 1 |      |        |      | Experiment 2 |      |       |      | Experiment 3 |      |       |      |
|----------------|--------------|------|--------|------|--------------|------|-------|------|--------------|------|-------|------|
|                | VEH          |      | AM251  |      | VEH          |      | AM251 |      | VEH          |      | AM251 |      |
|                | $R^2$        | $p$  | $R^2$  | $p$  | $R^2$        | $p$  | $R^2$ | $p$  | $R^2$        | $p$  | $R^2$ | $p$  |
| <b>ARC</b>     | 0.17         | 0.36 | 0.22   | 0.25 | 0.12         | 0.36 | 0.01  | 0.86 | 0.002        | 0.91 | 0.26  | 0.16 |
| <b>GluN2B</b>  | 0.04         | 0.68 | 0.11   | 0.43 | 0.01         | 0.86 | 0.04  | 0.63 | 0.22         | 0.24 | 0.04  | 0.62 |
| <b>GluA1</b>   | 0.36         | 0.12 | 0.15   | 0.4  | 0.01         | 0.77 | 0.02  | 0.77 | 0.001        | 0.94 | 0.04  | 0.62 |
| <b>GluA2</b>   | 0.37         | 0.15 | <0.001 | 0.99 | <0.001       | 0.98 | 0.004 | 0.88 | 0.29         | 0.17 | 0.01  | 0.84 |

806

807

808 **FIGURE 6-1**

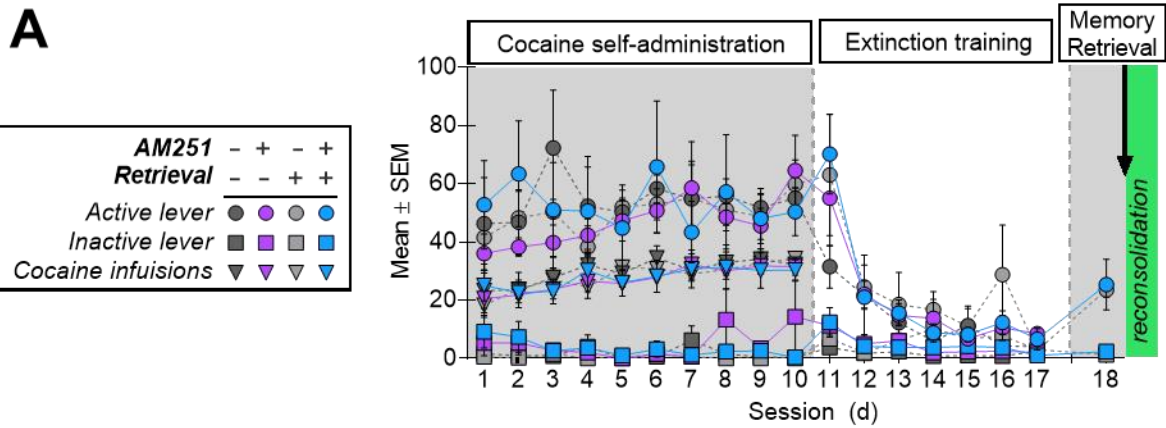

809

810 **Figure 6-1. Behavioral history in Experiment 5 (A)** Lever responses and cocaine infusions  
811 during drug self-administration, extinction training, and the 15-min memory-retrieval session in  
812 the cocaine-paired context prior to treatment (*arrow*). Statistics are provided in Table 6-1.

813 **Table 6-1 | Experiment 5 Behavioral History**

| Phase               | Measure          | Treatment Main Effects |      |           |      | Day Main Effects |       |           |         | Treatment x Day |        |           |      |
|---------------------|------------------|------------------------|------|-----------|------|------------------|-------|-----------|---------|-----------------|--------|-----------|------|
|                     |                  | Test                   | df   | Statistic | p    | Test             | df    | Statistic | p       | Test            | df     | Statistic | p    |
| Self-Administration | Active Lever     | F                      | 3,13 | 0.29      | 0.83 | F                | 9,117 | 0.75      | 0.66    | F               | 27,117 | 0.69      | 0.86 |
|                     | Inactive Lever   | F                      | 3,13 | 1.13      | 0.37 | F                | 9,117 | 0.77      | 0.65    | F               | 27,117 | 1.19      | 0.26 |
|                     | Cocaine Infusion | F                      | 3,13 | 0.11      | 0.95 | F                | 9,117 | 7.32      | <0.0001 | F               | 27,117 | 0.55      | 0.96 |
| Extinction          | Active Lever     | F                      | 3,12 | 0.10      | 0.96 | F                | 6,72  | 22.61     | <0.0001 | F               | 6,72   | 0.21      | 1.00 |
|                     | Inactive Lever   | F                      | 3,12 | 1.04      | 0.41 | F                | 6,72  | 6.63      | <0.0001 | F               | 6,72   | 1.06      | 0.41 |
| Memory Retrieval    | Active Lever     | t                      | 7    | 5.00      | 0.06 |                  |       |           |         |                 |        |           |      |
|                     | Inactive Lever   | t                      | 7    | 3.42      | 0.11 |                  |       |           |         |                 |        |           |      |

814

815

816

817 **Table 6-2 | Outward current frequency and amplitude with aCSF**

| Recording Condition | Measure                  | Treatment Main Effects |      |           |      | Day Main Effects |      |           |      | Treatment x Day |      |           |         | Post-hoc effects                                      |
|---------------------|--------------------------|------------------------|------|-----------|------|------------------|------|-----------|------|-----------------|------|-----------|---------|-------------------------------------------------------|
|                     |                          | Test                   | df   | Statistic | p    | Test             | df   | Statistic | p    | Test            | df   | Statistic | p       | Sidak's or Dunn's test, p < 0.05                      |
| aCSF                | sEPSC Frequency (+30 mV) | F                      | 1,20 | 0.07      | 0.80 | F                | 1,20 | 7.54      | 0.01 | F               | 1,20 | 3.01      | 0.10    | NA                                                    |
|                     | Frequency Distribution   |                        |      |           |      |                  |      |           |      | H               | 3    | 259.70    | <0.0001 | <i>Memory retrieval + AM251 &gt; all other groups</i> |
|                     | sEPSC Amplitude (+30 mV) | F                      | 1,20 | 0.02      | 0.89 | F                | 1,20 | 0.16      | 0.70 | F               | 1,20 | 1.43      | 0.25    | NA                                                    |
|                     | Amplitude Distribution   |                        |      |           |      |                  |      |           |      | H               | 3    | 16.36     | 0.00    | <i>No retrieval + AM251 &lt; all other groups</i>     |

818

819 **Table 7-1 | Outward current frequency and amplitude with AP5**

| Recording Condition | Measure                         | Treatment Main Effects |      |           |      | Day Main Effects |      |           |         | Treatment x Day |      |           |         | Post-hoc effects                                      |
|---------------------|---------------------------------|------------------------|------|-----------|------|------------------|------|-----------|---------|-----------------|------|-----------|---------|-------------------------------------------------------|
|                     |                                 | Test                   | df   | Statistic | p    | Test             | df   | Statistic | p       | Test            | df   | Statistic | p       | Sidak's or Dunn's test, p < 0.05                      |
| AP5                 | sEPSC Frequency (+30 mV)        | F                      | 1,43 | 2.67      | 0.11 | F                | 1,43 | 21.15     | <0.0001 | F               | 1,43 | 10.14     | 0.00    | <i>Memory retrieval + AM251 &gt; all other groups</i> |
|                     | Frequency Distribution (+30 mV) |                        |      |           |      |                  |      |           |         | H               | 3    | 180.70    | <0.0001 | <i>Memory retrieval + AM251 &gt; all other groups</i> |
|                     | sEPSC Amplitude (+30 mV)        | F                      | 1,44 | 0.41      | 0.53 | F                | 1,44 | 0.25      | 0.62    | F               | 1,43 | 1.67      | 0.20    | NA                                                    |
|                     | Amplitude Distribution (+30 mV) |                        |      |           |      |                  |      |           |         | H               | 3    | 0.46      | 0.93    | NA                                                    |

820

821

822 **REFERENCES**

- 823 Achterberg E, Trezza V, Vanderschuren LJ (2014) Glucocorticoid receptor antagonism disrupts  
824 the reconsolidation of social reward-related memories in rats. *Behav Pharmacol* 25:216–  
825 225.
- 826 Alaghband Y, O'Dell SJ, Azarnia S, Khalaj AJ, Guzowski JF, Marshall JF (2014) Retrieval-induced  
827 NMDA receptor-dependent Arc expression in two models of cocaine-cue memory. *Neurobiol*  
828 *Learn Mem* 116:79–89.
- 829 Arenos JD, Musty RE, Bucci DJ (2006) Blockade of cannabinoid CB1 receptors alters contextual  
830 learning and memory. *Eur J Pharmacol* 539:177–183.
- 831 Arguello AA, Hodges MA, Wells AM, Lara H, Xie X, Fuchs RA (2014) Involvement of amygdalar  
832 protein kinase A, but not calcium/calmodulin- dependent protein kinase II, in the  
833 reconsolidation of cocaine-related contextual memories in rats. *Psychopharmacology (Berl)*  
834 231:55–65.
- 835 Ben Mamou C, Gamache K, Nader K (2006) NMDA receptors are critical for unleashing  
836 consolidated auditory fear memories. *Nat Neurosci* 9:1237–1239.
- 837 Castillo PE, Younts TJ, Chávez AE, Hashimotodani Y (2012) Endocannabinoid signaling and  
838 synaptic function. *Neuron* 76:70–81.
- 839 Childress AR, McLellan TA, Ehrman R, O'Brien CP (1988) Classically conditioned responses in  
840 opioid and cocaine dependence: A role in relapse. *NIDA Res Monogr* 84:25–43.
- 841 Childress AR, Mozley PD, McElgin W, Fitzgerald J, Reivich M, O'Brien CP (1999) Limbic  
842 activation during cue-induced cocaine craving. *Am J Psychiatry* 156:11–18.
- 843 Clem RL, Huganir RL (2010) Calcium-permeable AMPA receptor dynamics mediate fear memory  
844 erasure. *Science* 330:1108–1112.

- 845 Crombag HS, Bossert JM, Koya E, Shaham Y (2008) Review. Context-induced relapse to drug  
846 seeking: a review. *Philos Trans R Soc Lond B Biol Sci* 363:3233–3243.
- 847 De Carvalho CR, Pamplona FA, Cruz JS, Takahashi RN (2014) Endocannabinoids underlie  
848 reconsolidation of hedonic memories in Wistar rats. *Psychopharmacology (Berl)* 231:1417–  
849 1425.
- 850 Diering GH, Gustina AS, Huganir RL (2014) PKA-GluA1 coupling via AKAP5 controls AMPA  
851 receptor phosphorylation and cell-surface targeting during bidirectional homeostatic  
852 plasticity. *Neuron* 84:790–805.
- 853 Diering GH, Huganir RL (2018) The AMPA receptor code of synaptic plasticity. *Neuron*  
854 100(2):314–329.
- 855 Fang Q, Li FQ, Li YQ, Xue YX, He YY, Liu JF, Lu L, Wang JS (2011) Cannabinoid CB1 receptor  
856 antagonist rimonabant disrupts nicotine reward-associated memory in rats. *Pharmacol*  
857 *Biochem Behav* 99:738–742.
- 858 Fuchs RA, Bell GH, Ramirez DR, Eaddy JL, Su Z (2009) Basolateral amygdala involvement in  
859 memory reconsolidation processes that facilitate drug context-induced cocaine seeking. *Eur*  
860 *J Neurosci* 30:889–900.
- 861 Fuchs RA, Eaddy JL, Su ZI, Bell GH (2007) Interactions of the basolateral amygdala with the  
862 dorsal hippocampus and dorsomedial prefrontal cortex regulate drug context-induced  
863 reinstatement of cocaine-seeking in rats. *Eur J Neurosci* 26:487–498.
- 864 Gobira PH, Aguiar DC, Moreira FA (2013) Effects of compounds that interfere with the  
865 endocannabinoid system on behaviors predictive of anxiolytic and panicolytic activities in the  
866 elevated T-maze. *Pharmacol Biochem Behav* 110:33–39.
- 867 Hayashi T, Huganir RL (2004) Tyrosine phosphorylation and regulation of the AMPA receptor by

- 868 Src family tyrosine kinases. *J Neurosci* 24:6152–6160.
- 869 He K, Song L, Cummings LW, Goldman J, Huganir RL, Lee H-K (2009) Stabilization of Ca<sup>2+</sup>-  
870 permeable AMPA receptors at perisynaptic sites by GluR1-S845 phosphorylation. *Proc Natl*  
871 *Acad Sci* 106:20033–20038.
- 872 Hearing MC, Schochet TL, See RE, McGinty JF (2010) Context-driven cocaine-seeking in  
873 abstinent rats increases activity-regulated gene expression in the basolateral amygdala and  
874 dorsal hippocampus differentially following short and long periods of abstinence.  
875 *Neuroscience* 170:570–9.
- 876 Hodge J, Bow JP, Plyler KS, Vemuri VK, Wisniecki A, Salamone JD, Makriyannis A, McLaughlin  
877 PJ (2008) The cannabinoid CB1 receptor inverse agonist AM 251 and antagonist AM 4113  
878 produce similar effects on the behavioral satiety sequence in rats. *Behav Brain Res* 193:298–  
879 305.
- 880 Hong I, Kim J, Kim J, Lee S, Ko H-G, Nader K, Kaang B-K, Tsien RW, Choi S (2013) AMPA  
881 receptor exchange underlies transient memory destabilization on retrieval. *Proc Natl Acad*  
882 *Sci USA* 110:8218–8223.
- 883 Kapur A, Zhao P, Sharir H, Bai Y, Caron MG, Barak LS, Abood ME (2009) Atypical  
884 responsiveness of the orphan receptor GPR55 to cannabinoid ligands. *J Biol Chem*  
885 284:29817–29827.
- 886 LeDoux J (2007) The amygdala. *Curr Biol* 17:868–874.
- 887 Lee JLC (2004) Independent cellular processes for hippocampal memory consolidation and  
888 reconsolidation. *Science* 304:839–843.
- 889 Lee JLC, Di Ciano P, Thomas KL, Everitt BJ (2005) Disrupting reconsolidation of drug memories  
890 reduces cocaine-seeking behavior. *Neuron* 47:795–801.



- 891 Lee JLC, Milton AL, Everitt BJ (2006) Cue-induced cocaine seeking and relapse are reduced by  
892 disruption of drug memory reconsolidation. *J Neurosci* 26:5881–5887.
- 893 Lewis DJ, Misanin JR, Miller RR (1968) Recovery of memory following amnesia. *Nature* 220:704–  
894 705.
- 895 Li L, Carter J, Gao X, Whitehead J, Tourtellotte WG (2005) The neuroplasticity-associated arc  
896 gene is a direct transcriptional target of early growth response (Egr) transcription factors. *Mol*  
897 *Cell Biol* 25:10286–10300.
- 898 Lopez J, Gamache K, Schneider R, Nader K (2015) Memory retrieval requires ongoing protein  
899 synthesis and NMDA receptor activity-mediated AMPA receptor trafficking. *J Neurosci*  
900 35:2465–2475.
- 901 Makino H, Malinow R (2009) AMPA receptor incorporation into synapses during LTP: The role of  
902 lateral movement and exocytosis. *Neuron* 64(3):381–390.
- 903 McLaughlin PJ, Winston K, Swezey L, Wisniecki A, Aberman J, Tardif DJ, Betz AJ, Ishiwari  
904 K, Makriyannis A, Salamone JD (2003) The cannabinoid CB1 antagonists SR 141716A and  
905 AM 251 suppress food intake and food-reinforced behavior in a variety of tasks in rats. *Behav*  
906 *Pharmacol* 14:583–588.
- 907 McDonald AJ (1984) Neuronal organization of the lateral and basolateral amygdaloid nuclei in the  
908 rat. *J Comp Neurol* 222:589–606.
- 909 Miller CA, Marshall JF (2005) Molecular substrates for retrieval and reconsolidation of cocaine-  
910 associated contextual memory. *Neuron* 47:873-84.
- 911 Milton AL, Lee JLC, Butler VJ, Gardner R, Everitt BJ (2008) Intra-amygdala and systemic  
912 antagonism of NMDA receptors prevents the reconsolidation of drug-associated memory  
913 and impairs subsequently both novel and previously acquired drug-seeking behaviors. *J*

914 Neurosci 28:8230–8237.

915 Milton AL, Merlo E, Ratano P, Gregory BL, Dumbreck JK, Everitt BJ (2013) Double dissociation  
916 of the requirement for GluN2B- and GluN2A-containing NMDA receptors in the  
917 destabilization and restabilization of a reconsolidating memory. *J Neurosci* 33:1109–1115.

918 Moreira FA, Crippa JAS (2009) The psychiatric side-effects of rimonabant. *Braz J Psychiatry*  
919 31:145–153.

920 Nadel L, Moscovitch M (1997) Memory consolidation, retrograde amnesia and the hippocampal  
921 complex. *Curr Opin Neurobiol* 7:217–227.

922 Nader K, Schafe GE, Le Doux JE (2000) Fear memories require protein synthesis in the amygdala  
923 for reconsolidation after retrieval. *Nature* 406:722–726.

924 Nakazawa T, Komai S, Watabe AM, Kiyama Y, Fukaya M, Arima-Yoshida F, Horai R, Sudo K,  
925 Ebine K, Delawary M, Goto J, Umemori H, Tezuka T, Iwakura Y, Watanabe M, Yamamoto  
926 T, Manabe T (2006) NR2B tyrosine phosphorylation modulates fear learning as well as  
927 amygdaloid synaptic plasticity. *EMBO J* 25:2867–2877.

928 National Research Council. 2011. *Guide for the Care and Use of Laboratory Animals: Eighth*  
929 *Edition*. Washington, DC: The National Academies Press.

930 Ortinski PI, Vassoler FM, Carlson GC, Pierce RC (2012) Temporally dependent changes in  
931 cocaine-induced synaptic plasticity in the nucleus accumbens shell are reversed by D1-like  
932 dopamine receptor stimulation. *Neuropsychopharmacology* 37:1671–1682.

933 Paoletti P, Bellone C, Zhou Q (2013) NMDA receptor subunit diversity: Impact on receptor  
934 properties, synaptic plasticity and disease. *Nat Rev Neurosci* 14:383–400.

935 Ramirez DR, Bell GH, Lasseter HC, Xie X, Traina SA, Fuchs RA (2009) Dorsal hippocampal  
936 regulation of memory reconsolidation processes that facilitate drug context-induced cocaine-

- 937 seeking behavior in rats. *Eur J Neurosci* 30:901–912.
- 938 Ramirez S, Liu X, Lin PA, Suh J, Pignatelli M, Redondo RL, Ryan TJ, Tonegawa S (2013) Creating  
939 a false memory in the hippocampus. *Science* 341:387–391.
- 940 Rao-Ruiz P, Rotaru DC, van der Loo RJ, Mansvelder HD, Stiedl O, Smit AB, Spijker S (2011)  
941 Retrieval-specific endocytosis of GluA2-AMPA receptors underlies adaptive reconsolidation of  
942 contextual fear. *Nat Neurosci* 14:1302–1308.
- 943 Rao-Ruiz P, Schmitz LJMM, Smit AB, Spijker S (2015) AMPA receptor plasticity in retrieval,  
944 reconsolidation and post-retrieval extinction of memories. In: *Novel Mechanisms of Memory*,  
945 pp 21–41. Cham: Springer International Publishing.
- 946 Rescorla RA (2004) Spontaneous recovery. *Learn Mem* 11:501–9.
- 947 Rich MT, Torregrossa MM (2018) Molecular and synaptic mechanisms regulating drug-associated  
948 memories: Towards a bidirectional treatment strategy. *Brain Res Bull* 141:58–71.
- 949 Rich MT, Huang YH, Torregrossa MM (2019) Plasticity at thalamo-amygdala synapses regulates  
950 cocaine-cue memory formation and extinction. *Cell Rep.* 26(4):1010–1020.
- 951 Richards BA, Frankland PW (2017) The persistence and transience of memory. *Neuron* 94:1071–  
952 1084.
- 953 Richardson BD, Rossi DJ (2017) Recreational concentrations of alcohol enhance synaptic  
954 inhibition of cerebellar unipolar brush cells via pre- and postsynaptic mechanisms. *J*  
955 *Neurophysiol* 118:267–279.
- 956 Roy DS, Arons A, Mitchell TI, Pignatelli M, Ryan TJ, Tonegawa S (2016) Memory retrieval by  
957 activating engram cells in mouse models of early Alzheimer’s disease. *Nature* 531:508–512.
- 958 Sah P, Faber ESL, Lopez De Armentia M, Power J (2003) The amygdaloid complex: anatomy

959 and physiology. *Physiol Rev* 83:803–834.

960 Saladin ME, Gray KM, McRae-Clark AL, Larowe SD, Yeatts SD, Baker NL, Hartwell KJ, Brady  
961 KT (2013) A double blind, placebo-controlled study of the effects of post-retrieval propranolol  
962 on reconsolidation of memory for craving and cue reactivity in cocaine dependent humans.  
963 *Psychopharmacology (Berl)* 226:721–737.

964 Sanderson JL, Gorski JA, Dell'Acqua ML (2016) NMDA receptor-dependent LTD requires  
965 transient synaptic incorporation of Ca<sup>2+</sup>-permeable AMPARs mediated by AKAP150-  
966 Aachored PKA and calcineurin. *Neuron* 89(5):1000–15.

967 Schutz-Geschwender A, Zhang Y, Holt T, Mcdermitt D, Olive DM, Biosciences L (2004)  
968 Quantitative, two-color western blot detection with infrared fluorescence. *LI-COR Biosci*  
969 800:1–8.

970 Seely KA, Brents LK, Franks LN, Rajasekaran M, Zimmerman SM, Fantegrossi WE, Prather PL  
971 (2012) AM-251 and rimonabant act as direct antagonists at mu-opioid receptors: Implications  
972 for opioid/cannabinoid interaction studies. *Neuropharmacology* 63:905–15.

973 Stern CAJ, de Carvalho CR, Bertoglio LJ, Takahashi RN (2018) Effects of cannabinoid drugs on  
974 aversive or rewarding drug-associated memory extinction and reconsolidation.  
975 *Neuroscience* 370:62–80.

976 Stringfield SJ, Higginbotham JA, Wang R, Berger AL, McLaughlin RJ, Fuchs RA (2017) Role of  
977 glucocorticoid receptor-mediated mechanisms in cocaine memory reconsolidation.  
978 *Neuropharmacology* 123:349–358.

979 Theberge FR, Milton AL, Belin D, Lee JL, Everitt BJ (2010) The basolateral amygdala and nucleus  
980 accumbens core mediate dissociable aspects of drug memory reconsolidation. *Learn Mem*  
981 17:444–453.

- 982 Tronson NC, Taylor JR (2007) Molecular mechanisms of memory reconsolidation. *Nat Rev*  
983 *Neurosci* 8:262–275.
- 984 Turrigiano G, Long-term NR, Lüscher C, Malenka RC, Harris KM, Weinberg RJ, Smart TG,  
985 Paoletti P, Südhof C (2014) Homeostatic synaptic plasticity: Local and global mechanisms  
986 for stabilizing. *Cell* 135:422–435.
- 987 Turrigiano GG (2008) The self-tuning neuron: Synaptic scaling of excitatory synapses. *Cell*  
988 135:422–435.
- 989 Wang H, Treadway T, Covey DP, Cheer JF, Lupica CR (2015) Cocaine-induced endocannabinoid  
990 mobilization in the ventral tegmental area. *Cell Rep* 12:1997–2008.
- 991 Wells AM, Arguello AA, Xie X, Blanton MA, Lasseter HC, Reittinger AM, Fuchs RA (2013)  
992 Extracellular signal-regulated kinase in the basolateral amygdala, but not the nucleus  
993 accumbens core, is critical for context-response-cocaine memory reconsolidation in rats.  
994 *Neuropsychopharmacology* 38:753–762.
- 995 Wells AM, Lasseter HC, Xie X, Cowhey KE, Reittinger AM, Fuchs R a. (2011) Interaction between  
996 the basolateral amygdala and dorsal hippocampus is critical for cocaine memory  
997 reconsolidation and subsequent drug context-induced cocaine-seeking behavior in rats.  
998 *Learn Mem* 18:693–702.
- 999 Wells AM, Xie X, Higginbotham JA, Arguello AA, Healey KL, Blanton M, Fuchs RA (2016)  
1000 Contribution of an SFK-mediated signaling pathway in the dorsal hippocampus to cocaine-  
1001 memory reconsolidation in Rats. *Neuropsychopharmacology* 41:675–685.
- 1002 Yu LL, Wang XXY, Zhao M, Liu Y, Li YQ, Li FQ, Wang XXY, Xue YX, Lu L (2009) Effects of  
1003 cannabinoid CB1 receptor antagonist rimonabant in consolidation and reconsolidation of  
1004 methamphetamine reward memory in mice. *Psychopharmacology (Berl)* 204:203–211.

1005 Yu Y-J, Huang C-H, Chang C-H, Gean P-W (2016) Involvement of protein phosphatases in the  
1006 destabilization of methamphetamine-associated contextual memory. *Learn Mem* 23:486–  
1007 493.  
1008
